# Supplementary material
Source: Research Square preprint supplement (doi:10.21203/rs.3.rs-7039715/v1)
Supplement: Supplementary file 1 [file d290b5497962efee50472fc4.pdf]

# Supplementary information for ‘Substantial contribution of avalanches to glacier accumulation in the 21st century’

Marin Kneib ([kneibm@ethz.ch](mailto:kneibm@ethz.ch))<sup>1, 2</sup>, Fabien Maussion<sup>3, 4</sup>, Fanny Brun<sup>5</sup>, Guillem Carcanade<sup>5</sup>, Daniel Farionotti<sup>1, 2</sup>, Matthias Huss<sup>1, 2</sup>, Marit van Tiel<sup>1, 2</sup>, Achille Jouberton<sup>2, 6</sup>, Patrick Schmitt<sup>4</sup>, Lilian Schuster<sup>4</sup>, Amaury Dehecq<sup>5</sup>, Nicolas Champollion<sup>5</sup>

1. Laboratory of Hydraulics, Hydrology and Glaciology (VAW), ETH Zurich, Zurich, Switzerland
2. Swiss Federal Institute for Forest, Snow and Landscape Research (WSL), bâtiment ALPOLE, Sion, Switzerland
3. Department of Atmospheric and Cryospheric Sciences, University of Innsbruck, Innsbruck, 6020, Austria
4. School of Geographical Sciences, University of Bristol, Bristol, BS8 1QU, UK
5. Institut des Géosciences de l'Environnement, Université Grenoble Alpes, CNRS, IRD, Grenoble, 38400, France
6. Institute of Science and Technology Austria, ISTA, Klosterneuburg, Austria

|                                                                             |          |
|-----------------------------------------------------------------------------|----------|
| <b>Supplementary Tables</b> .....                                           | <b>2</b> |
| <b>Supplementary Figures</b> .....                                          | <b>4</b> |
| Glacier-wide avalanche contribution and glacier variables.....              | 4        |
| Influence of avalanches on the recalibration of the mass balance model..... | 7        |
| Altitudinal mass balance profiles .....                                     | 8        |
| Projected ice volume changes.....                                           | 9        |
| Projected avalanche contribution changes .....                              | 19       |
| Influence of temporarily updating the avalanche contribution .....          | 24       |
| Evaluation against Sentinel-1 avalanche deposits.....                       | 25       |
| Evaluation against mass balance measurements.....                           | 27       |
| Influence of DEM spatial resolution .....                                   | 28       |

## 32 Supplementary Tables

33 **Supplementary Table 1: regional avalanche contribution metrics averaged over the**  
 34 **period 01/2000 - 12/2019. These values were used to compute Figure 2.**

| RGI region                         | Regional positive avalanche contribution (%) | Regional negative avalanche contribution (%) | Regional net avalanche contribution (%) | Median avalanche contribution (%) | 20th percentile of avalanche contribution (%) | 80th percentile of avalanche contribution (%) | Glacier area (km <sup>2</sup> ) | Total snow accumulation (m w.eq. yr <sup>-1</sup> ) |
|------------------------------------|----------------------------------------------|----------------------------------------------|-----------------------------------------|-----------------------------------|-----------------------------------------------|-----------------------------------------------|---------------------------------|-----------------------------------------------------|
| Alaska                             | 5.2                                          | -0.9                                         | 4.3                                     | 1.4                               | -0.4                                          | 11.9                                          | 86,492                          | 2.5                                                 |
| Western Canada and USA             | 6.8                                          | -1.5                                         | 5.2                                     | 2.4                               | -0.2                                          | 16.2                                          | 14,567                          | 2.3                                                 |
| Arctic Canada North                | 0.0                                          | -0.1                                         | -0.1                                    | -0.1                              | -0.2                                          | 0.1                                           | 105,253                         | 0.7                                                 |
| Arctic Canada South                | 0.5                                          | -0.2                                         | 0.3                                     | 0.0                               | -0.3                                          | 0.5                                           | 40,760                          | 0.9                                                 |
| Greenland Periphery                | 2.4                                          | -0.6                                         | 1.8                                     | 0.3                               | -0.3                                          | 6.6                                           | 74,766                          | 1.5                                                 |
| Iceland                            | 0.2                                          | -0.1                                         | 0.1                                     | 0.2                               | -0.2                                          | 1.8                                           | 11,015                          | 2.9                                                 |
| Svalbard and Jan Mayen             | 0.2                                          | -0.1                                         | 0.1                                     | 0.1                               | -0.2                                          | 0.7                                           | 34,017                          | 1.4                                                 |
| Scandinavia                        | 3.4                                          | -0.6                                         | 2.8                                     | 0.6                               | -0.3                                          | 9.5                                           | 2,958                           | 2.4                                                 |
| Russian Arctic                     | 0.0                                          | -0.1                                         | -0.1                                    | -0.1                              | -0.2                                          | 0.1                                           | 52,020                          | 1.0                                                 |
| North Asia                         | 3.2                                          | -1.0                                         | 2.1                                     | 0.8                               | -0.3                                          | 6.0                                           | 2,330                           | 1.3                                                 |
| Central Europe                     | 11.1                                         | -1.9                                         | 9.1                                     | 4.8                               | -0.3                                          | 26.0                                          | 2,044                           | 2.4                                                 |
| Caucasus and Middle East           | 11.1                                         | -3.7                                         | 7.4                                     | 3.0                               | -1.5                                          | 15.6                                          | 1,139                           | 2.5                                                 |
| Central Asia                       | 3.0                                          | -1.3                                         | 4.3                                     | 0.2                               | -0.3                                          | 1.6                                           | 49,344                          | 1.0                                                 |
| South Asia West                    | 5.9                                          | -1.2                                         | 4.7                                     | 0.6                               | -0.5                                          | 5.7                                           | 33,669                          | 1.2                                                 |
| South Asia East                    | 19.2                                         | -8.0                                         | 11.2                                    | 2.0                               | -0.7                                          | 15.6                                          | 14,492                          | 2.1                                                 |
| Low Latitudes                      | 5.7                                          | -8.0                                         | -2.3                                    | -0.3                              | -5.9                                          | 2.6                                           | 2,251                           | 1.9                                                 |
| Southern Andes                     | 2.9                                          | -4.4                                         | -1.5                                    | 0.1                               | -1.7                                          | 2.1                                           | 29,137                          | 1.5                                                 |
| New Zealand                        | 21.8                                         | -7.2                                         | 14.6                                    | 2.9                               | -9.3                                          | 30.8                                          | 1,125                           | 3.4                                                 |
| Subantarctic and Antarctic Islands | 0.5                                          | -0.5                                         | 0.0                                     | -0.0                              | -0.8                                          | 1.4                                           | 135,762                         | 1.7                                                 |
| Global                             | 3.0                                          | -1.1                                         | 2.0                                     | 0.4                               | -0.4                                          | 5.9                                           | 693,150                         | 1.5                                                 |

35

36

37

38

**Supplementary Table 2: Statistics of number and area of successfully modelled glaciers for each RGI region.**

| RGI region | Total number of glaciers | Total glacier area in 2000 (km <sup>2</sup> ) | Successfully modelled glaciers (%) | Successfully modelled area (%) |
|------------|--------------------------|-----------------------------------------------|------------------------------------|--------------------------------|
| 01         | 27108                    | 86725                                         | 99.6                               | 100.0                          |
| 02         | 18855                    | 14524                                         | 98.3                               | 99.9                           |
| 03         | 4556                     | 105111                                        | 99.4                               | 100.0                          |
| 04         | 7415                     | 40888                                         | 99.5                               | 100.0                          |
| 05         | 18306                    | 89717                                         | 99.1                               | 83.3                           |
| 06         | 568                      | 11060                                         | 100.0                              | 100.0                          |
| 07         | 1615                     | 33959                                         | 100.0                              | 100.0                          |
| 08         | 3417                     | 2949                                          | 99.6                               | 100.0                          |
| 09         | 1069                     | 51592                                         | 99.7                               | 100.0                          |
| 10         | 5151                     | 2410                                          | 96.5                               | 96.3                           |
| 11         | 3927                     | 2092                                          | 96.5                               | 99.8                           |
| 12         | 1888                     | 1307                                          | 80.7                               | 87.9                           |
| 13         | 54429                    | 49303                                         | 99.3                               | 99.8                           |
| 14         | 27988                    | 33568                                         | 99.6                               | 99.9                           |
| 15         | 13119                    | 14734                                         | 99.1                               | 99.7                           |
| 16         | 2939                     | 2341                                          | 94.2                               | 97.3                           |
| 17         | 15908                    | 29429                                         | 98.6                               | 99.1                           |
| 18         | 3537                     | 1162                                          | 97.1                               | 93.9                           |
| 19         | 2752                     | 132867                                        | 80.4                               | 99.8                           |
| Global     | 214547                   | 705738                                        | 98.6                               | 97.7                           |

**Supplementary Table 3: Effect of DEM spatial resolution on regional avalanche contribution.** Regional avalanche contribution metrics for Central Europe over the period 01/2000 - 12/2019 for the model run at 50 m, 100 m and variable spatial resolution.

| DEM spatial resolution (m)                    | 50   | 100  | Variable (reference) |
|-----------------------------------------------|------|------|----------------------|
| Regional net avalanche contribution (%)       | 9.4  | 8.9  | 9.1                  |
| Regional positive avalanche contribution (%)  | 11.4 | 11.1 | 11.1                 |
| Regional negative avalanche contribution (%)  | -2.1 | -2.2 | -1.9                 |
| Median avalanche contribution (%)             | 3.7  | 4.7  | 4.8                  |
| 20th percentile of avalanche contribution (%) | -2.7 | -1.0 | -0.3                 |
| 80th percentile of avalanche contribution (%) | 24.2 | 18.5 | 26.0                 |

## 54 Supplementary Figures

### 55 Glacier-wide avalanche contribution and glacier variables

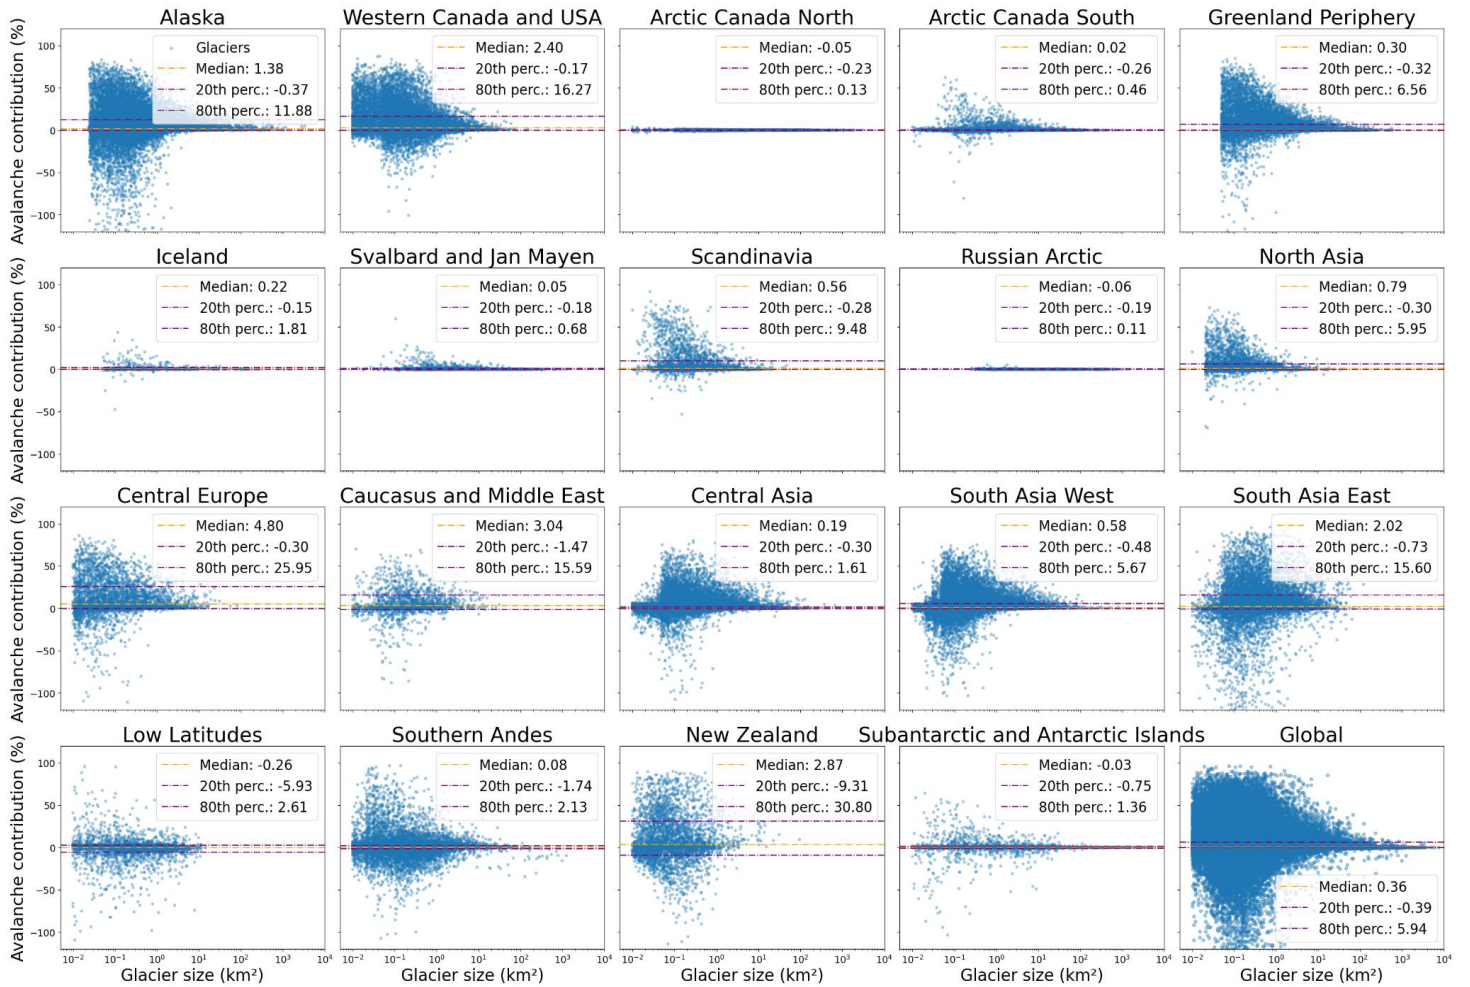

57 **Supplementary Figure 1: Glacier-wide net avalanche contribution as a function of**  
 58 **glacier size for each RGI region. The yellow horizontal line corresponds to the median**  
 59 **glacier-wide net avalanche contribution and the purple lines correspond to the 20th and 80th**  
 60 **percentile values.**

61

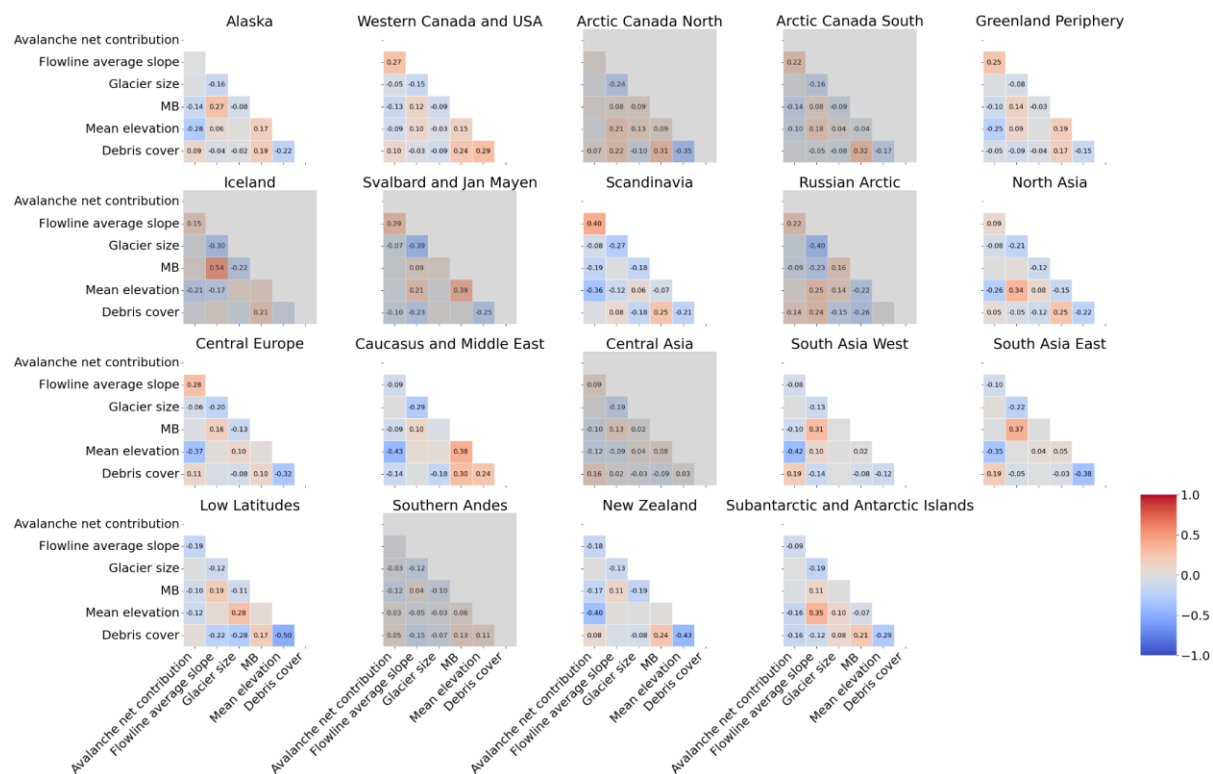

**Supplementary Figure 2: Characteristics of avalanche-fed glaciers.** Correlation matrices of the glacier-wide net avalanche contribution, glacier average slope along the flowline, size, geodetic mass balance, mean elevation and percentage of debris cover for each RGI region. The values correspond to Pearson's correlation coefficients, and only those with a significant correlation ( $p$ -value  $< 0.01$ ) are shown. Regions with a 20th and 80th percentile of the net avalanche contribution within -5% and +5%, which corresponds to a generally low influence from avalanches, are shaded in gray.

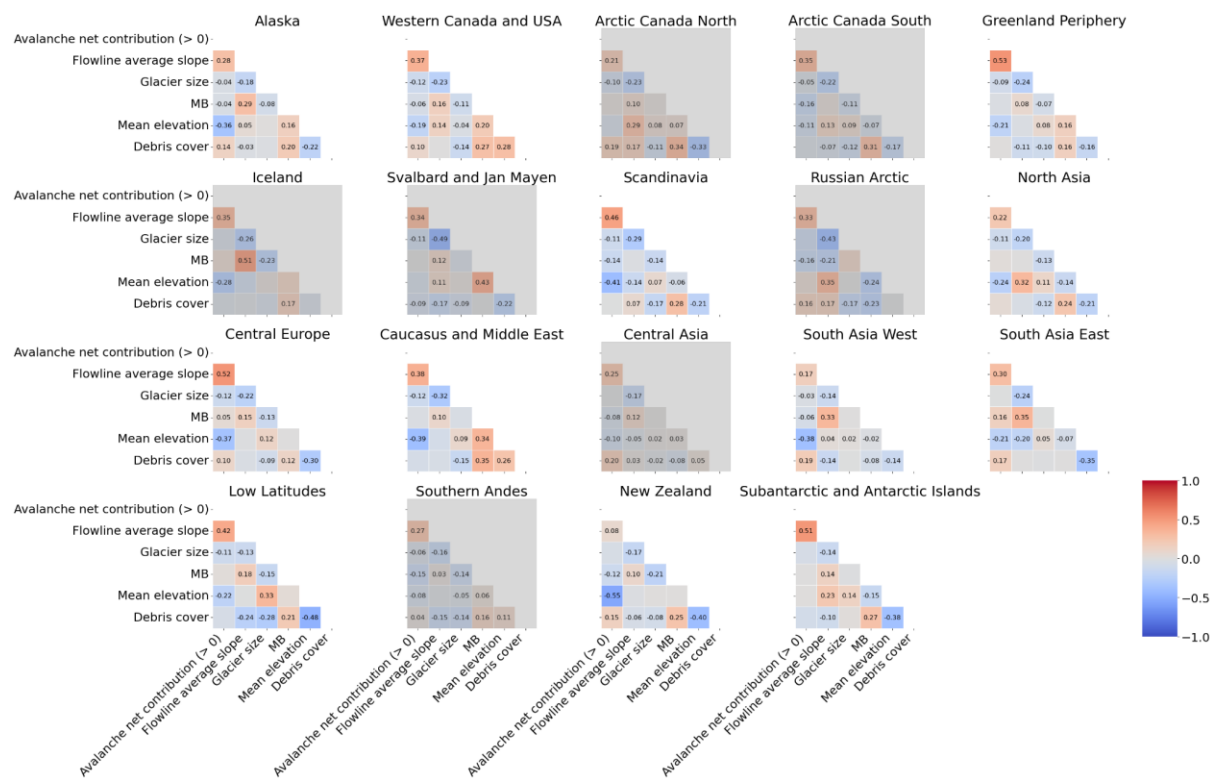

**Supplementary Figure 3: Characteristics of positively avalanche-fed glaciers.** Same as Fig. S2 but only for a strictly positive glacier-wide net avalanche contribution to the glacier accumulation.

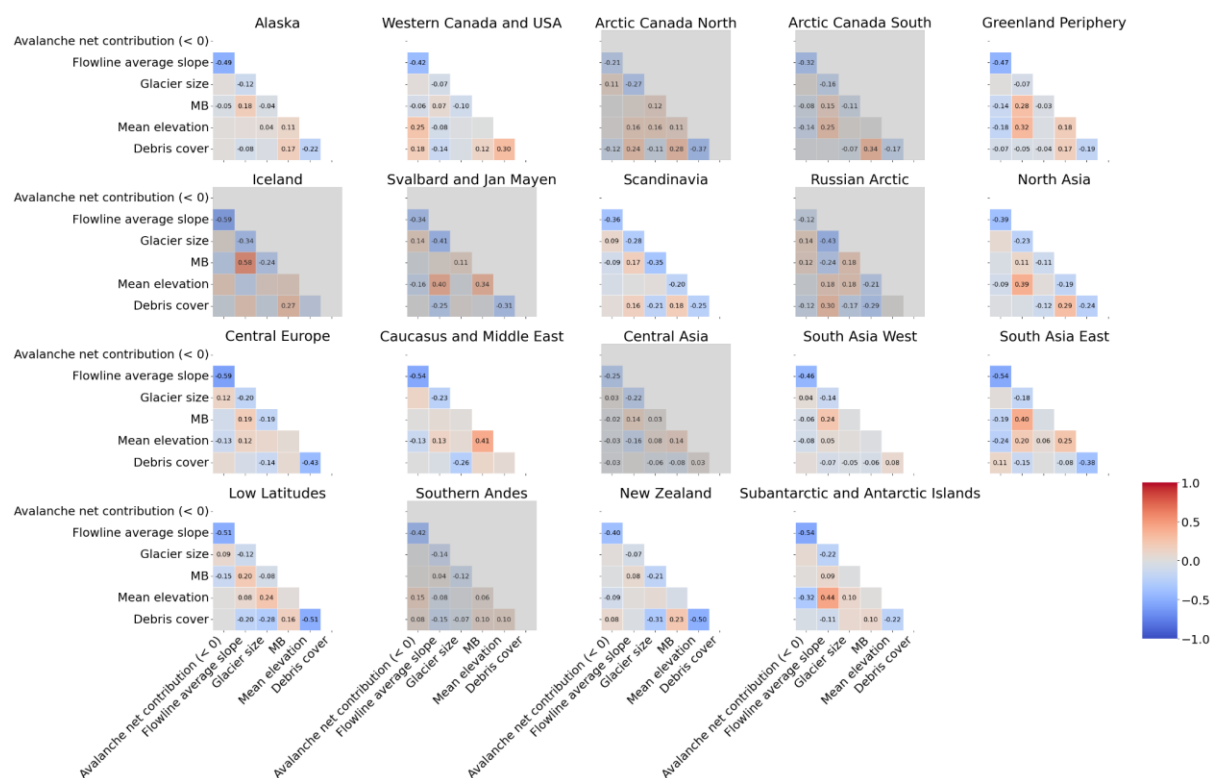

**Supplementary Figure 4: Characteristics of negatively avalanche-fed glaciers.** Same as Fig. S2 but only for a strictly negative glacier-wide net avalanche contribution to the glacier accumulation.

Influence of avalanches on the recalibration of the mass balance model

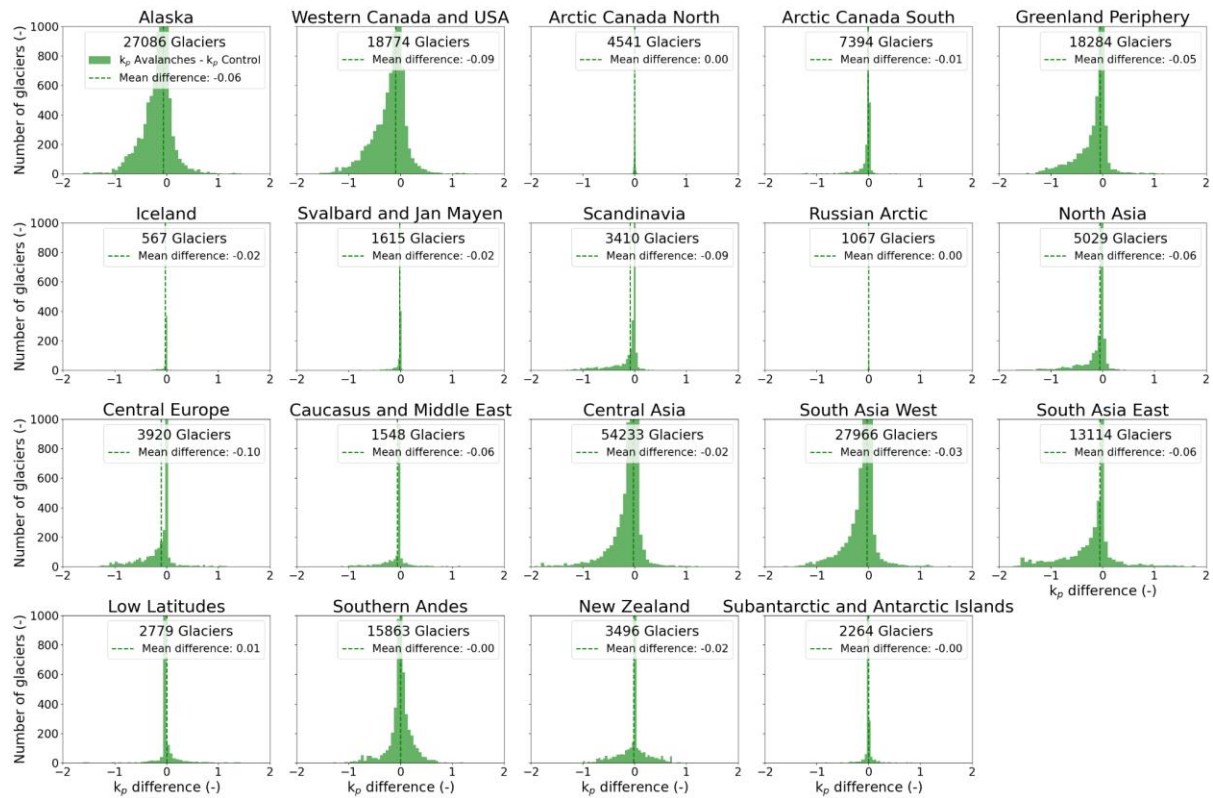

**Supplementary Figure 5: Precipitation correction factor with and without avalanches.** Differences between precipitation correction factor ( $k_p$ ) for all glaciers, with and without accounting for avalanches, after calibration of the 'Control' and 'Avalanches' models over the period 01/2000-12/2019. A negative value means that the precipitation correction factor is lower when explicitly accounting for avalanches.



## 89 Altitudinal mass balance profiles

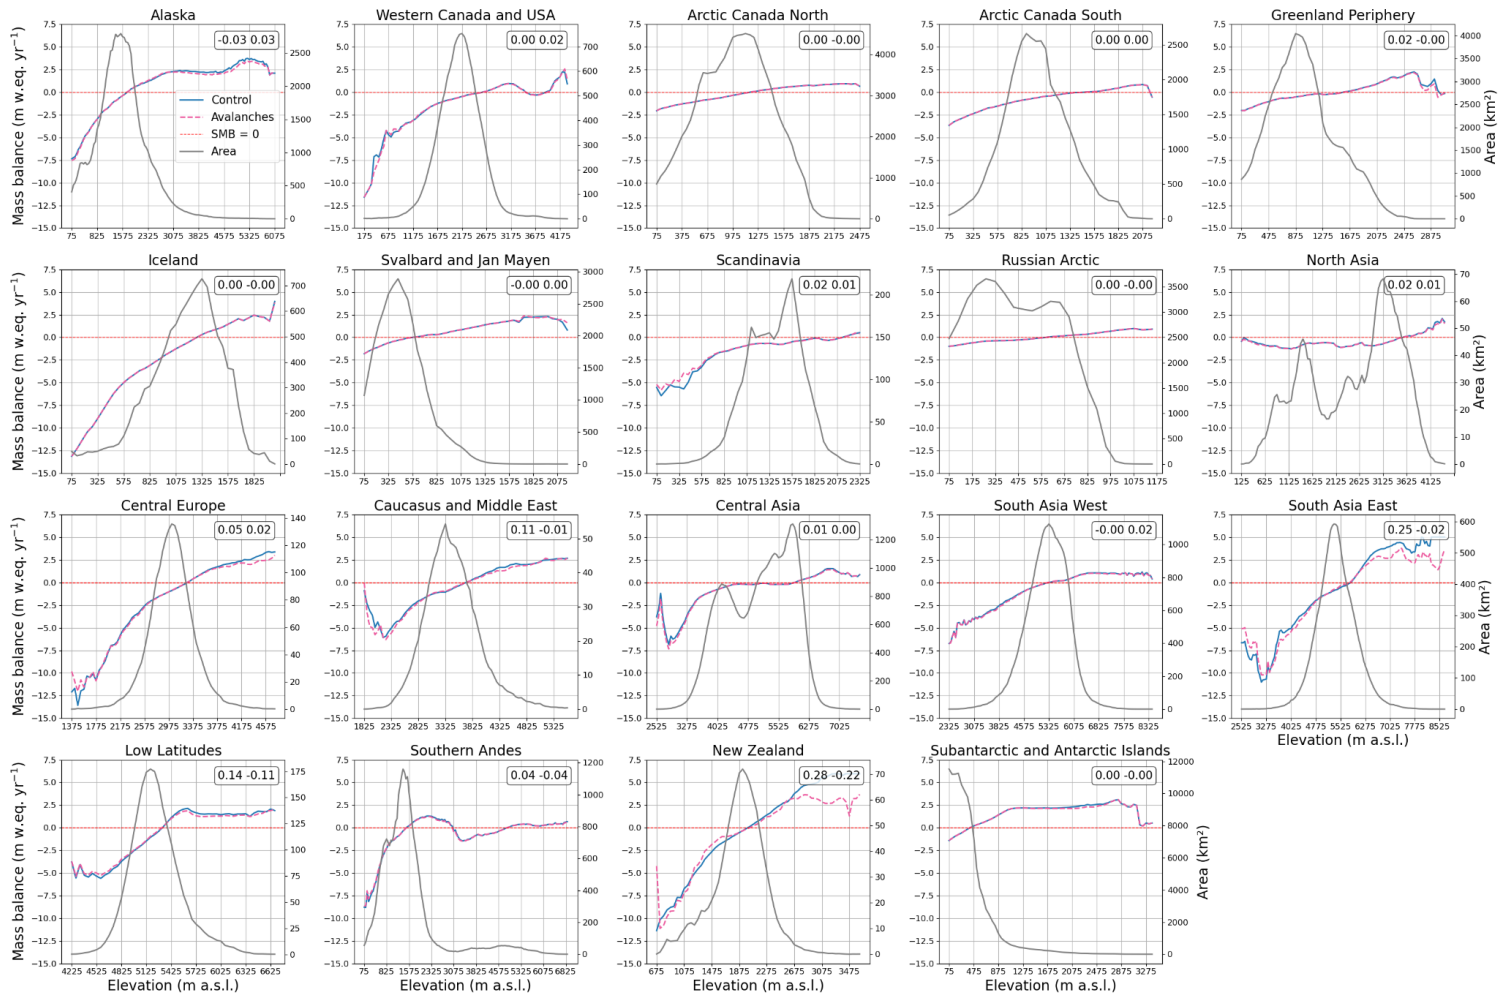

91 **Supplementary Figure 6: Influence of avalanches on the regional mass balance**  
 92 **altitudinal profiles.** Altitudinal mass balance profiles with (blue) and without (pink)  
 93 avalanches for all RGI 6.0 regions. These profiles were obtained by taking the area-weighted  
 94 average of the altitudinal profiles of all glaciers of the corresponding regions over the period  
 95 01/2000-12/2019. The gray line shows the glacier hypsometry and the red dashed line  
 96 corresponds to a mass balance value of 0 m w.eq. yr<sup>-1</sup>. The values in the upper right corner  
 97 indicate the area-weighted mean difference between the mass balance with and without  
 98 avalanches in the accumulation and the ablation zones.

99

# Projected ice volume changes

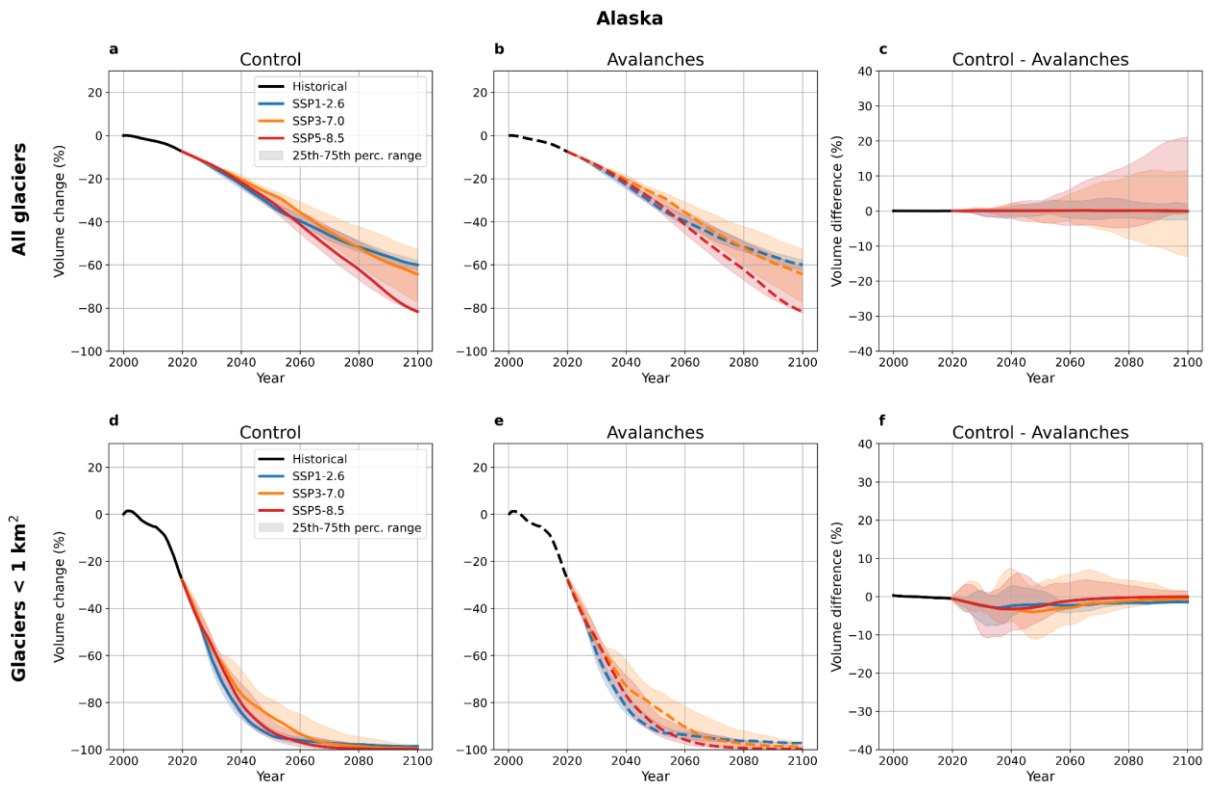

**Supplementary Figure 7: Influence of avalanches on regional glacier volume changes in Alaska.** Projected ice volume changes of all glaciers (a-c) and the glaciers smaller than 1 km<sup>2</sup> (d-f) in Alaska, from the 'Control' (a, d) and 'Avalanches' (b, e) simulations. The right-hand plots (c, f) show the difference between the 'Control' and the 'Avalanches' simulations, so that negative values indicate more volume in the 'Avalanches' simulations. All percentages are given relative to the initial volume in 2000 in the 'Control' simulation. The black line corresponds to the historical period over which the mass balance model was calibrated using W5E5v2.0 data. The colored lines show the median future projections for different SSP scenarios, and the shaded areas indicate the 25th-75th percentile range. The different curves were smoothed using a 5-year rolling mean.

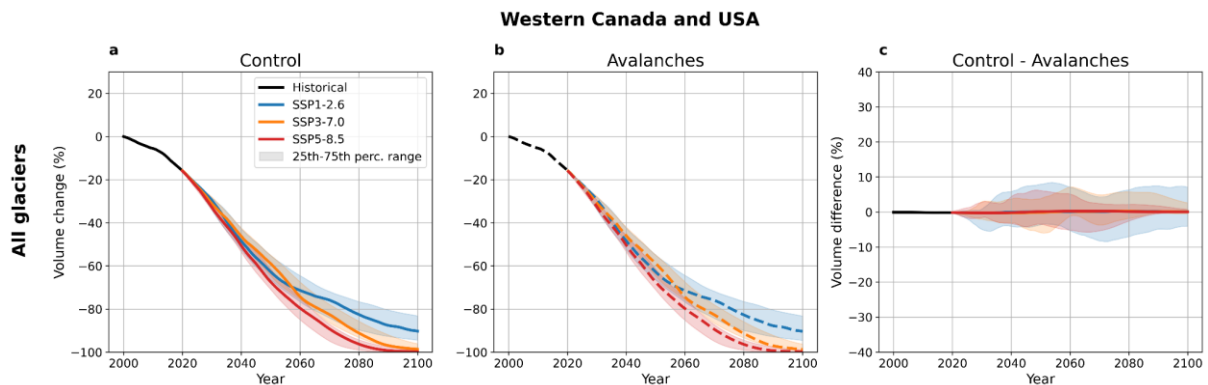

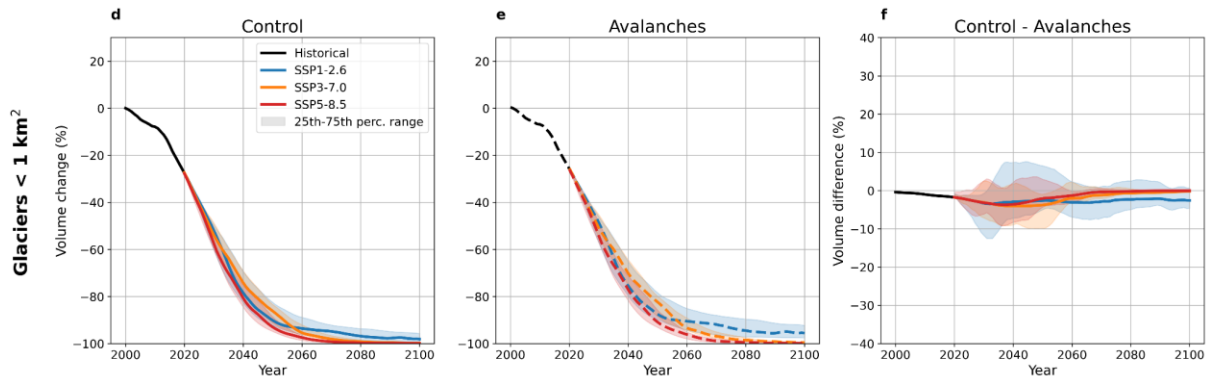

**Supplementary Figure 8: Influence of avalanches on regional glacier volume changes in Western Canada and USA. Same as Fig. S7 but for Western Canada & USA.**

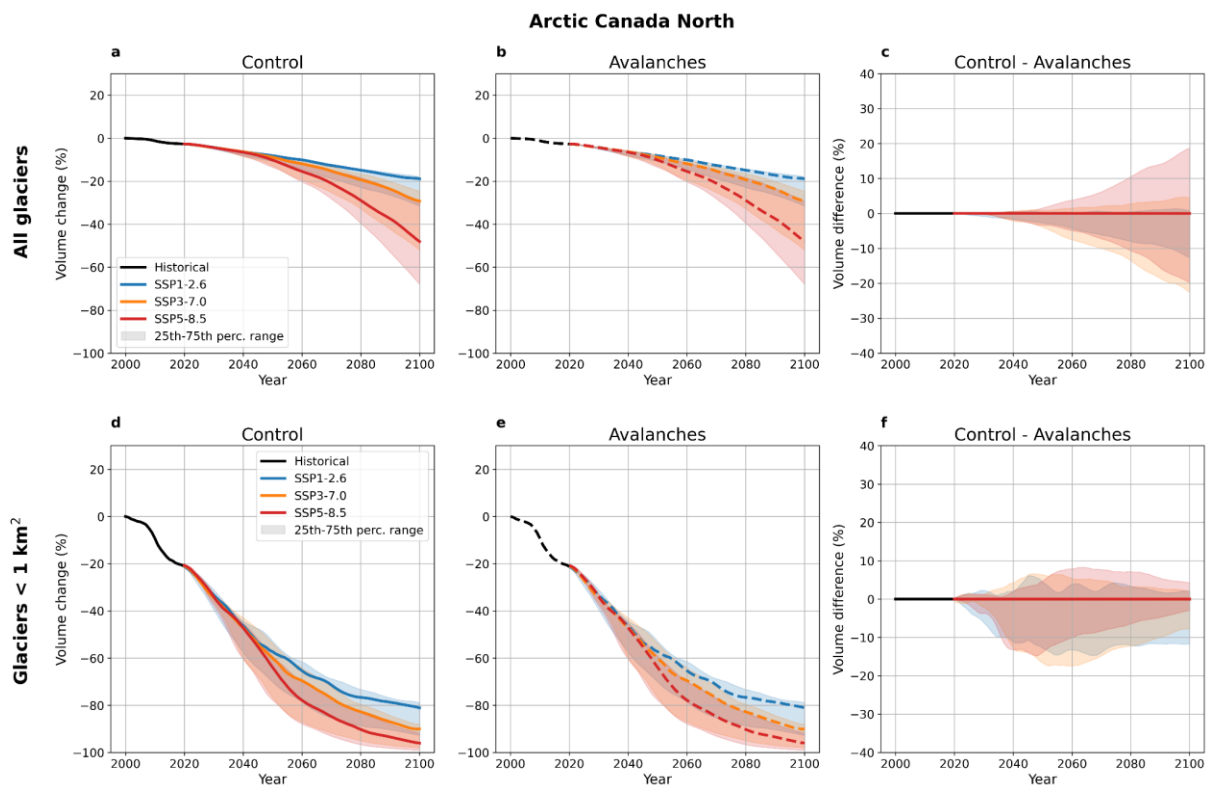

**Supplementary Figure 9: Influence of avalanches on regional glacier volume changes in Arctic Canada North. Same as Fig. S7 but for Arctic Canada North.**

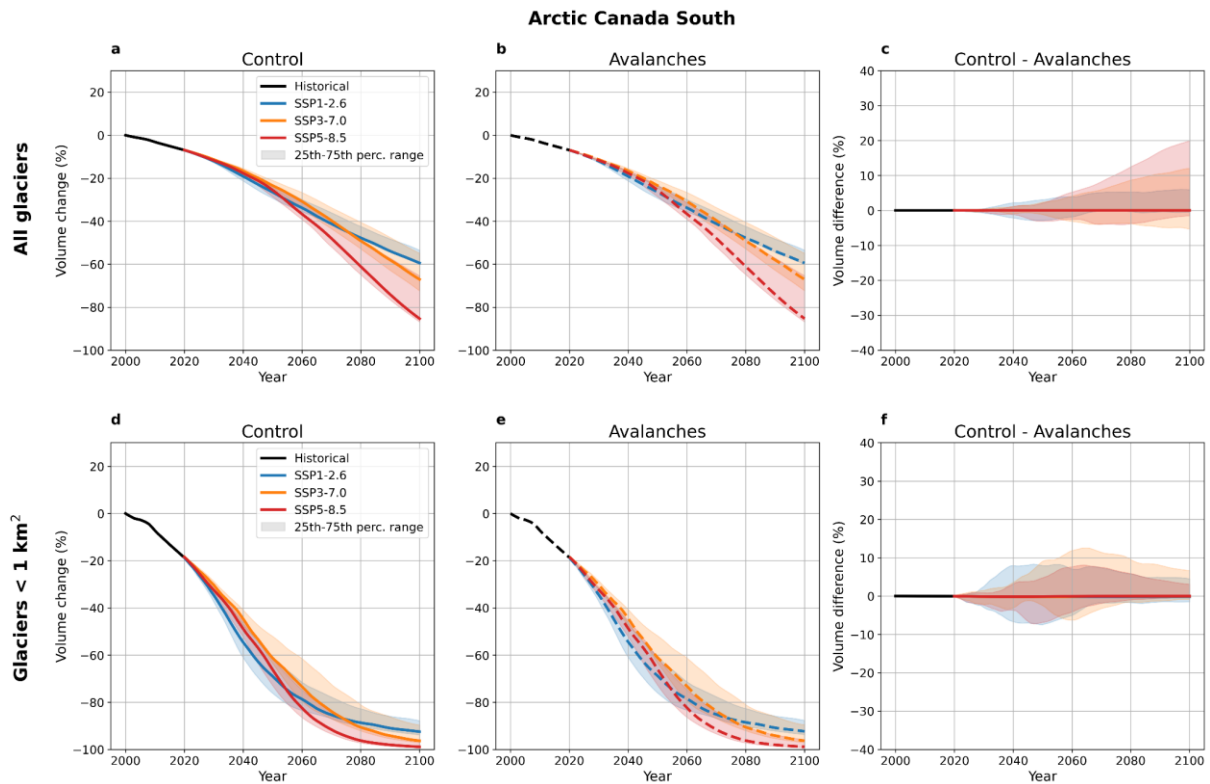

**Supplementary Figure 10: Influence of avalanches on regional glacier volume changes in Arctic Canada South.** Same as Fig. S7 but for Arctic Canada South.

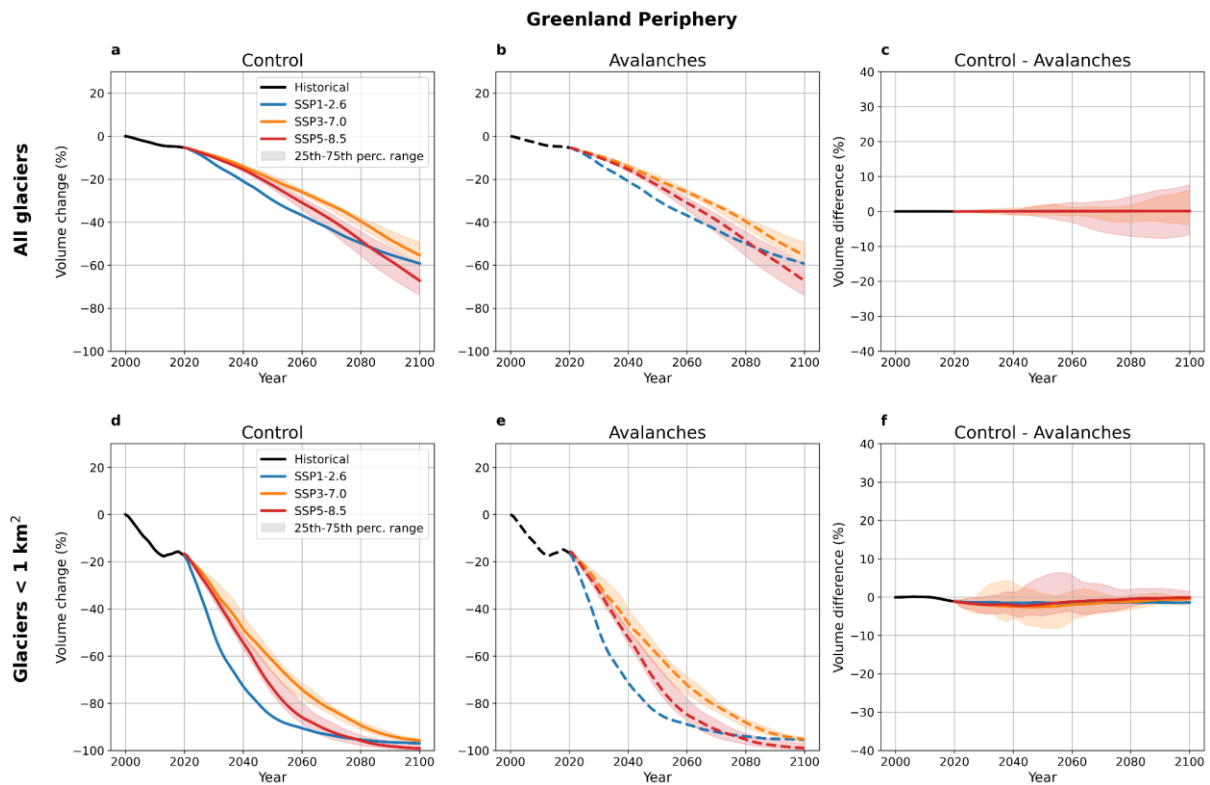

**Supplementary Figure 11: Influence of avalanches on regional glacier volume changes in the Greenland Periphery.** Same as Fig. S7 but for Greenland Periphery.

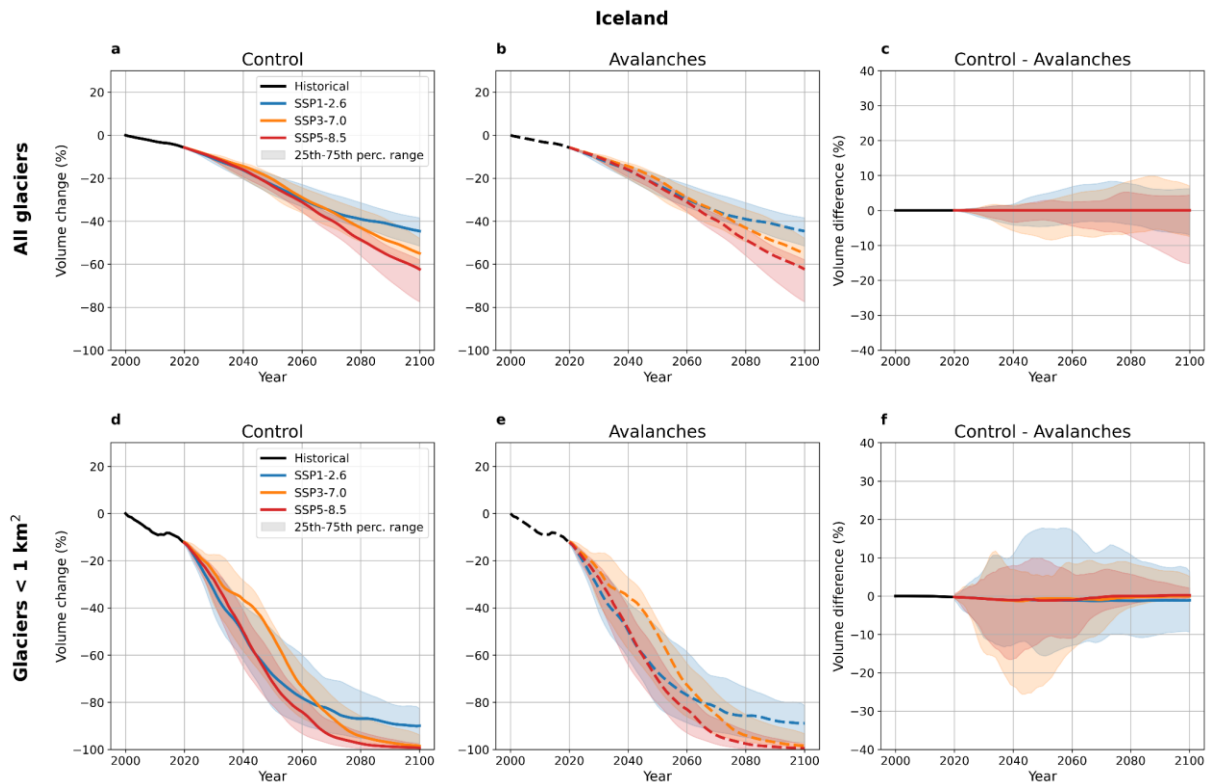

**Supplementary Figure 12: Influence of avalanches on regional glacier volume changes in Iceland. Same as Fig. S7 but for Iceland.**

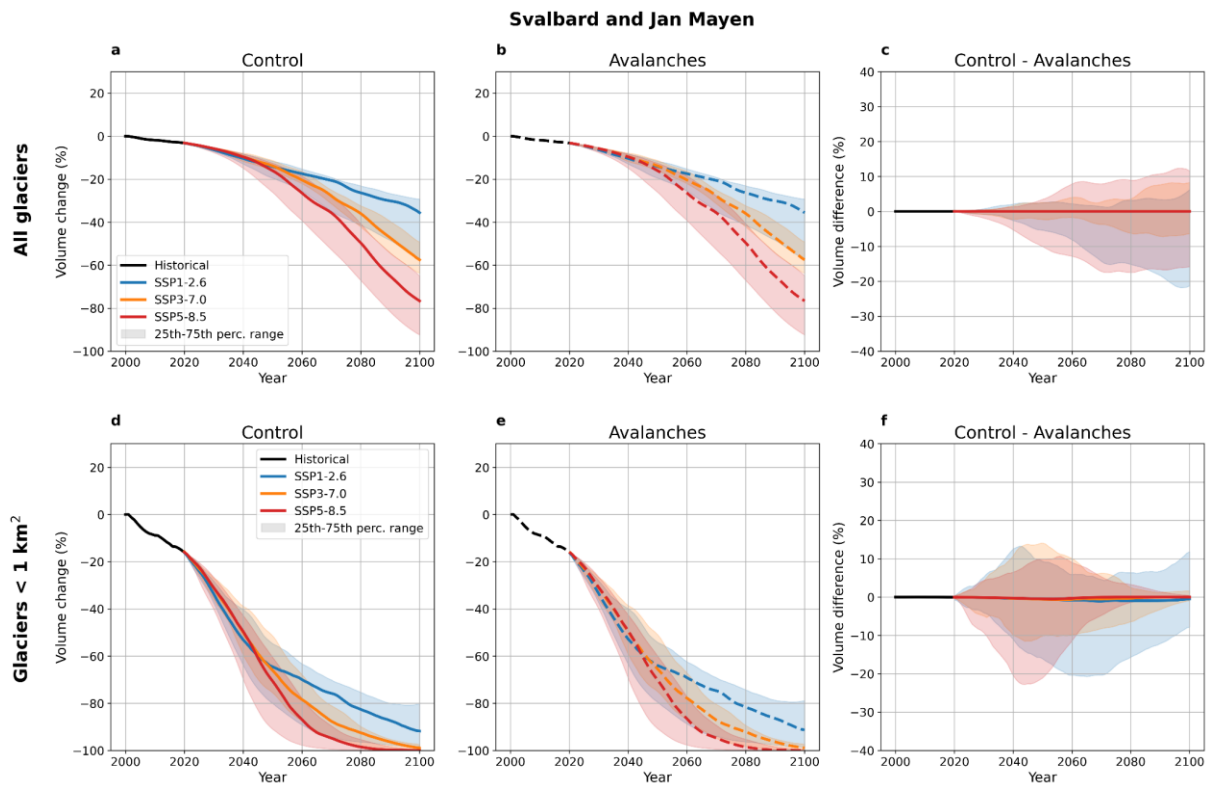

**Supplementary Figure 13: Influence of avalanches on regional glacier volume changes in Svalbard and Jan Mayen. Same as Fig. S7 but for Svalbard and Jan Mayen.**

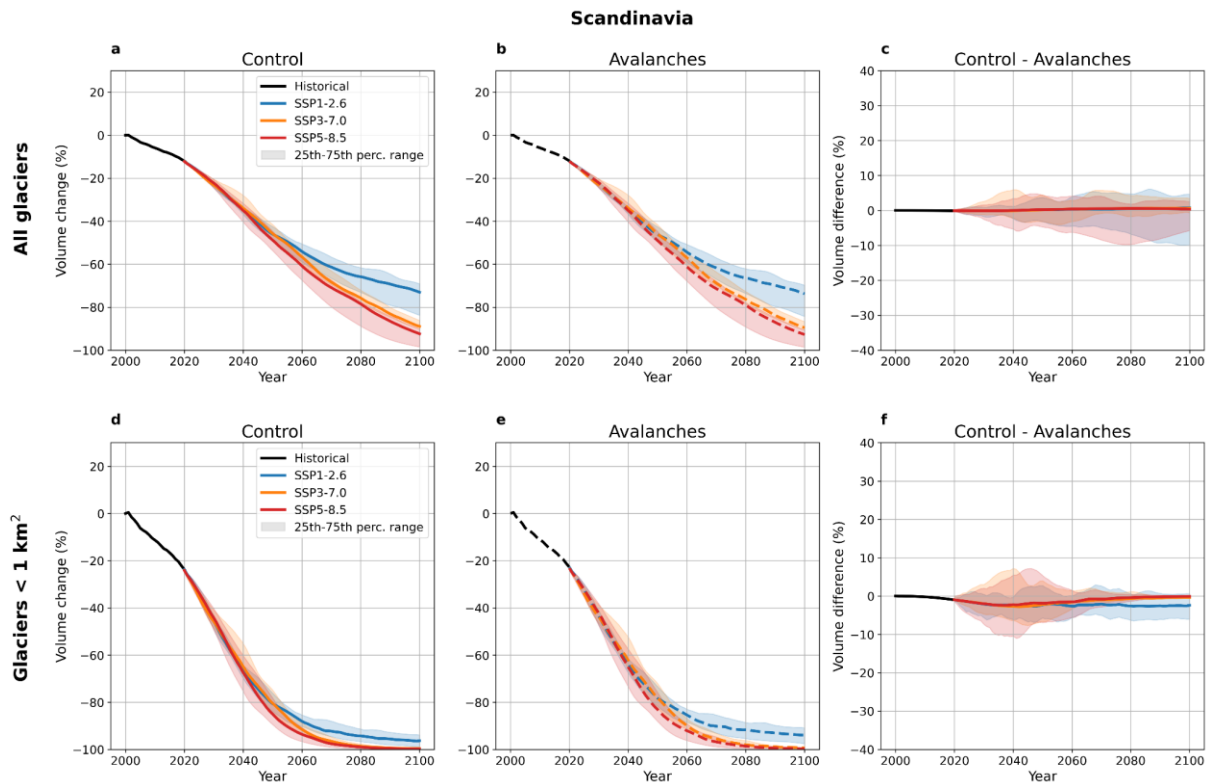

**Supplementary Figure 14: Influence of avalanches on regional glacier volume changes in Scandinavia. Same as Fig. S7 but for Scandinavia.**

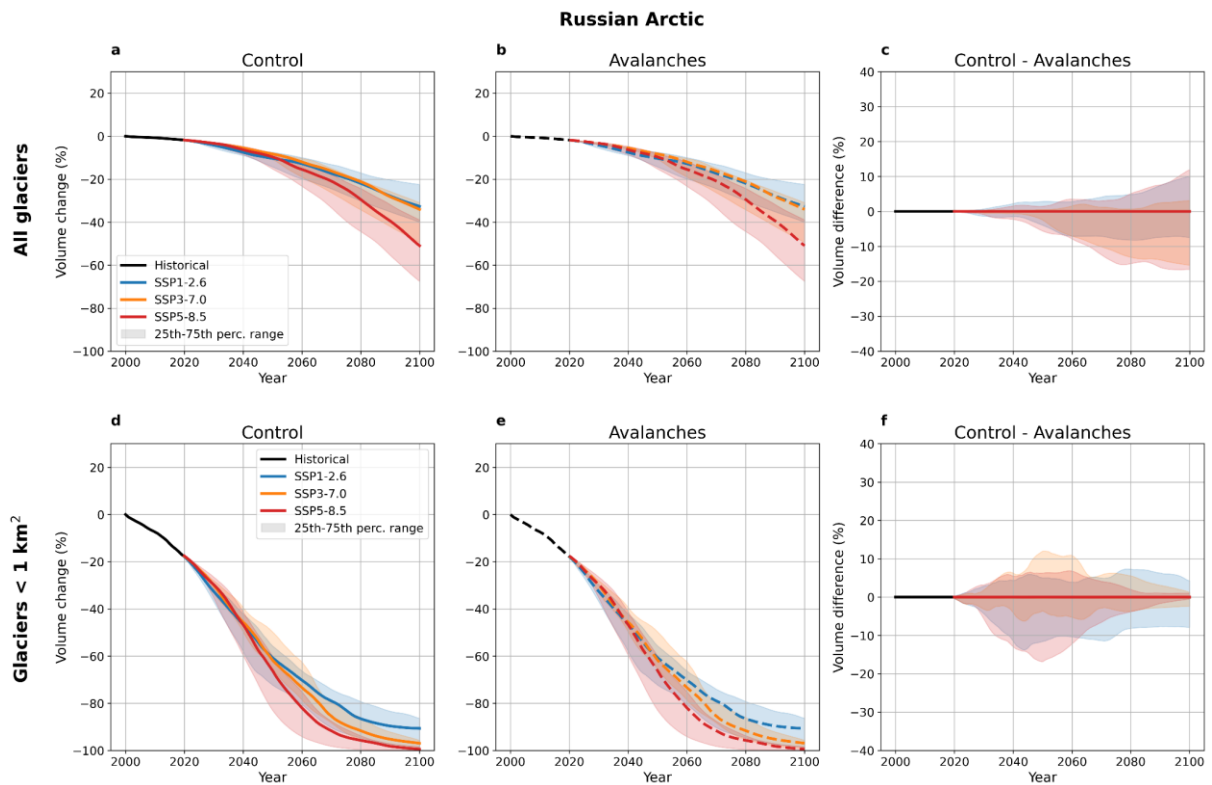

**Supplementary Figure 15: Influence of avalanches on regional glacier volume changes in the Russian Arctic. Same as Fig. S7 but for the Russian Arctic.**



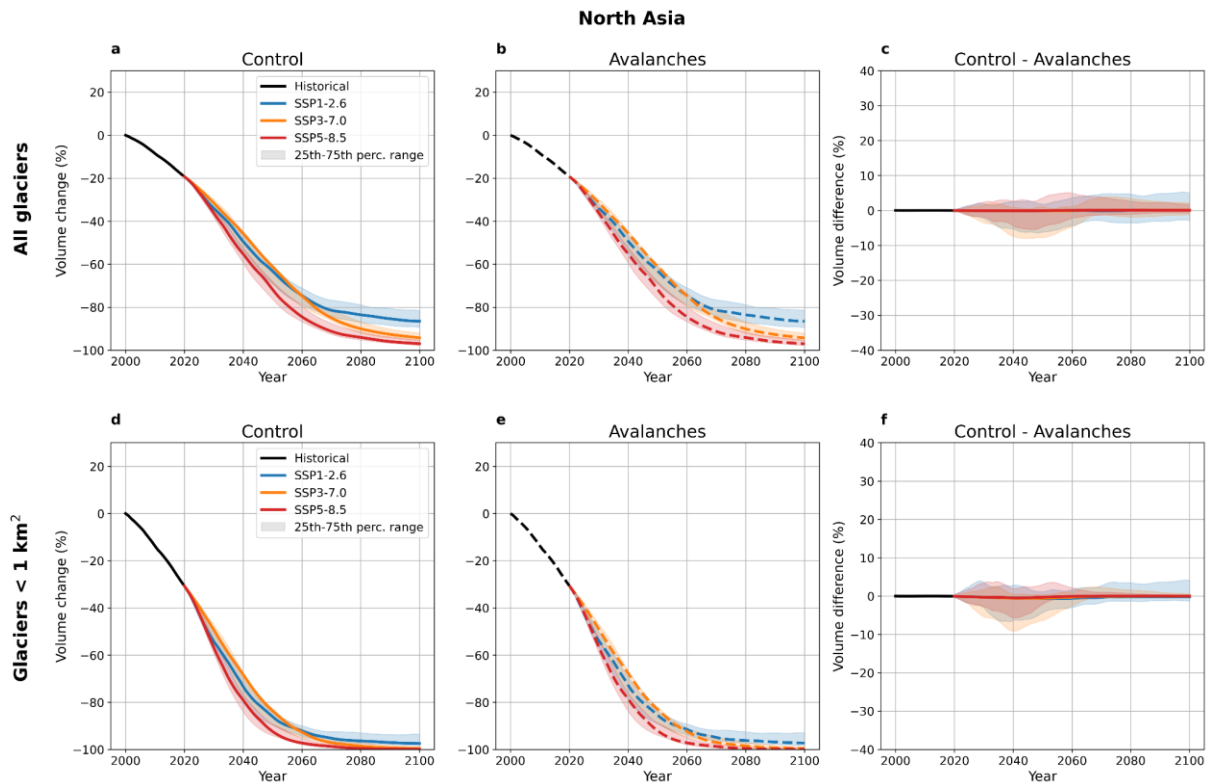

**Supplementary Figure 16: Influence of avalanches on regional glacier volume changes in North Asia.** Same as Fig. S7 but for North Asia.

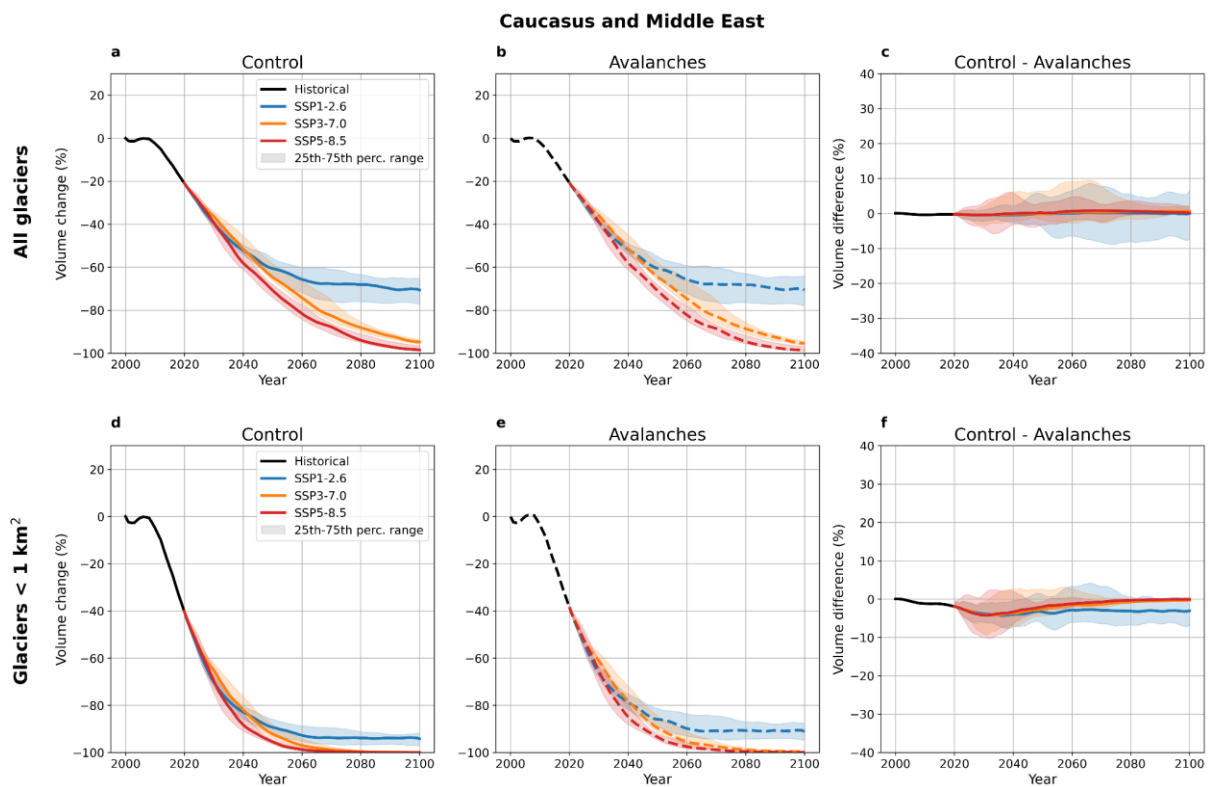

**Supplementary Figure 17: Influence of avalanches on regional glacier volume changes in Caucasus and the Middle East.** Same as Fig. S7 but for Caucasus and the Middle East.

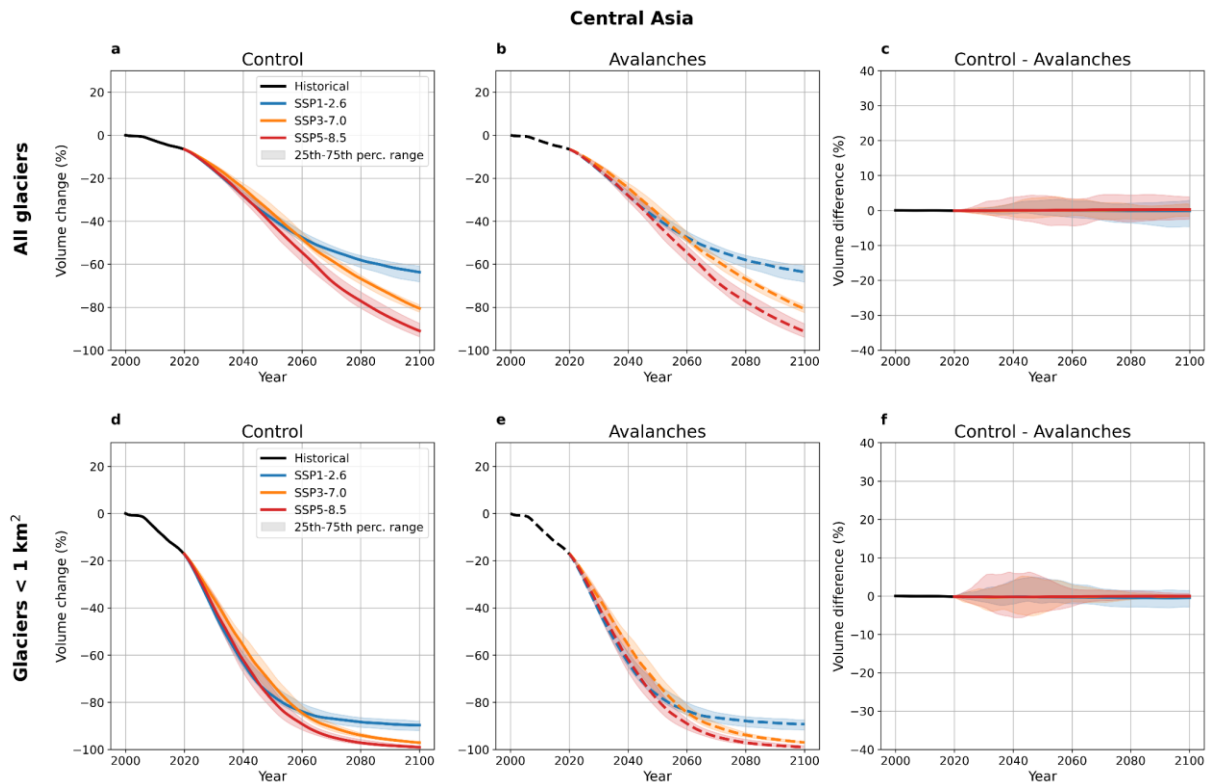

**Supplementary Figure 18: Influence of avalanches on regional glacier volume changes in Central Asia.** Same as Fig. S7 but for Central Asia.

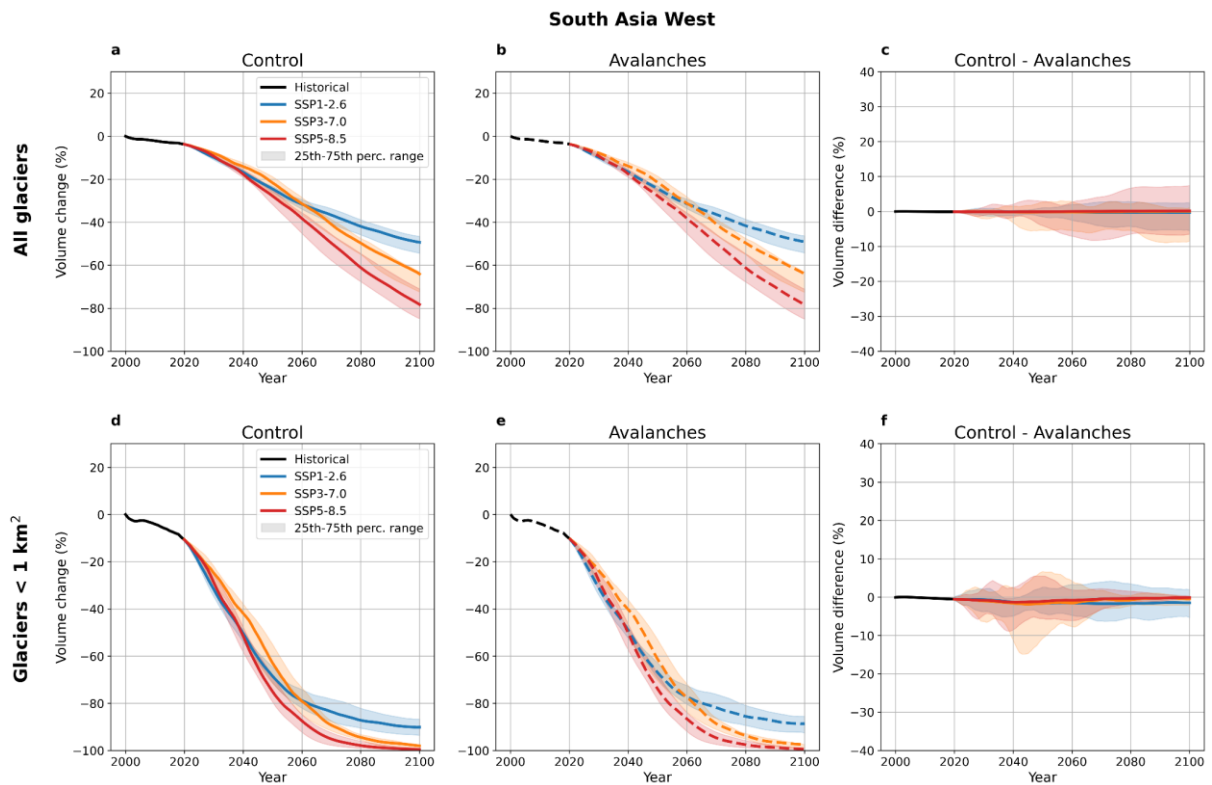

**Supplementary Figure 19: Influence of avalanches on regional glacier volume changes in South Asia West.** Same as Fig. S7 but for South Asia West.



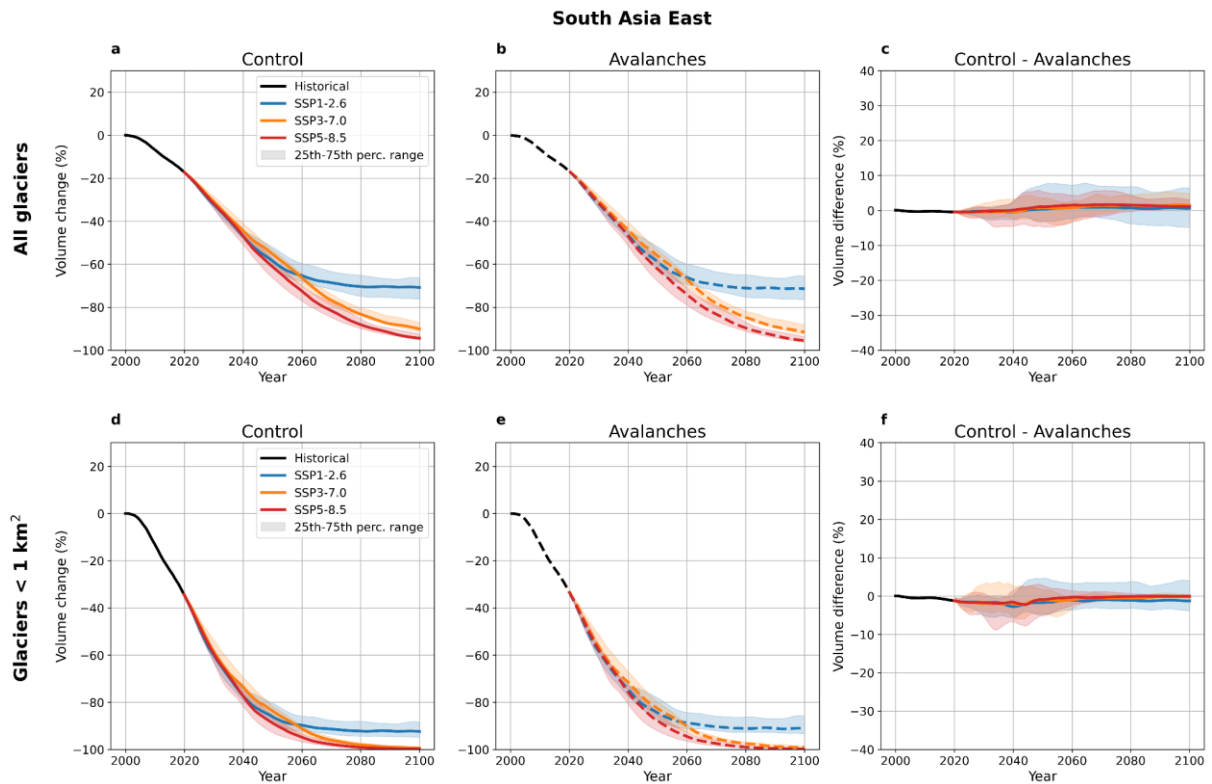

**Supplementary Figure 20: Influence of avalanches on regional glacier volume changes in South Asia East. Same as Fig. S7 but for South Asia East.**

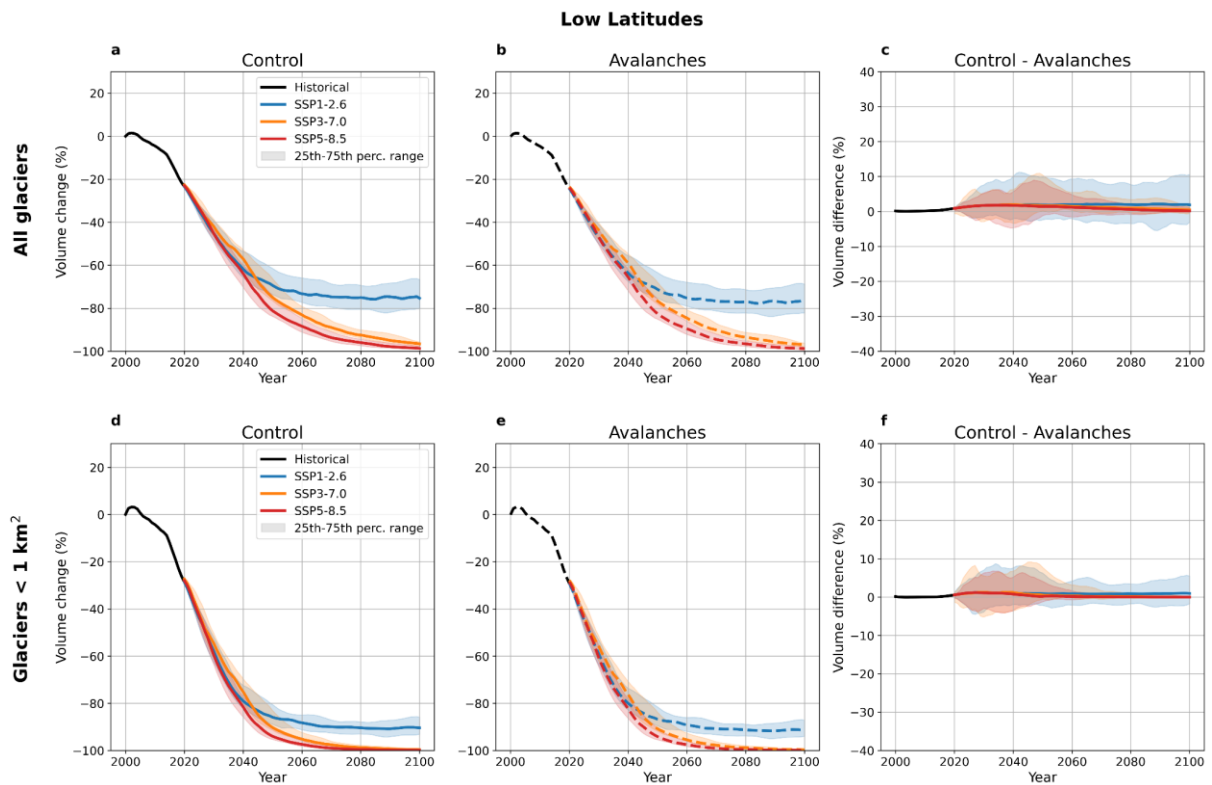

**Supplementary Figure 21: Influence of avalanches on regional glacier volume changes in the Low Latitudes. Same as Fig. S7 but for the Low Latitudes.**

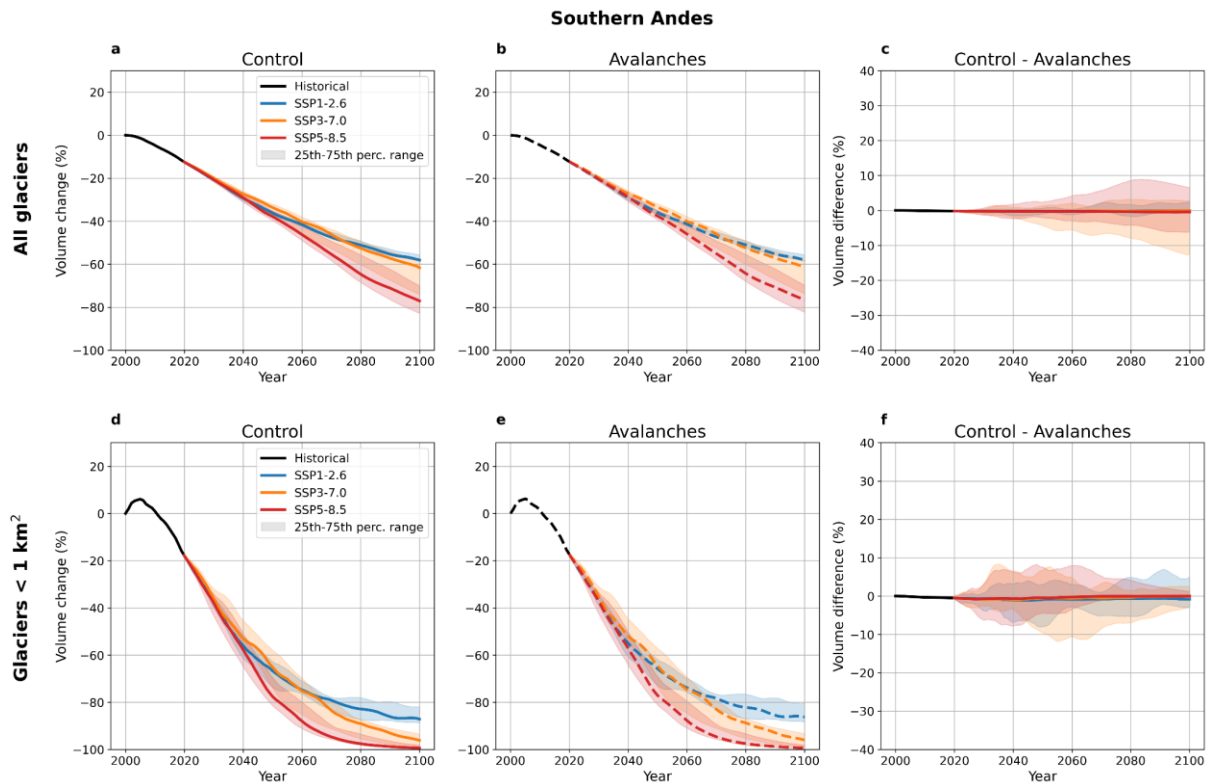

**Supplementary Figure 22: Influence of avalanches on regional glacier volume changes in the Southern Andes.** Same as Fig. S7 but for the Southern Andes.

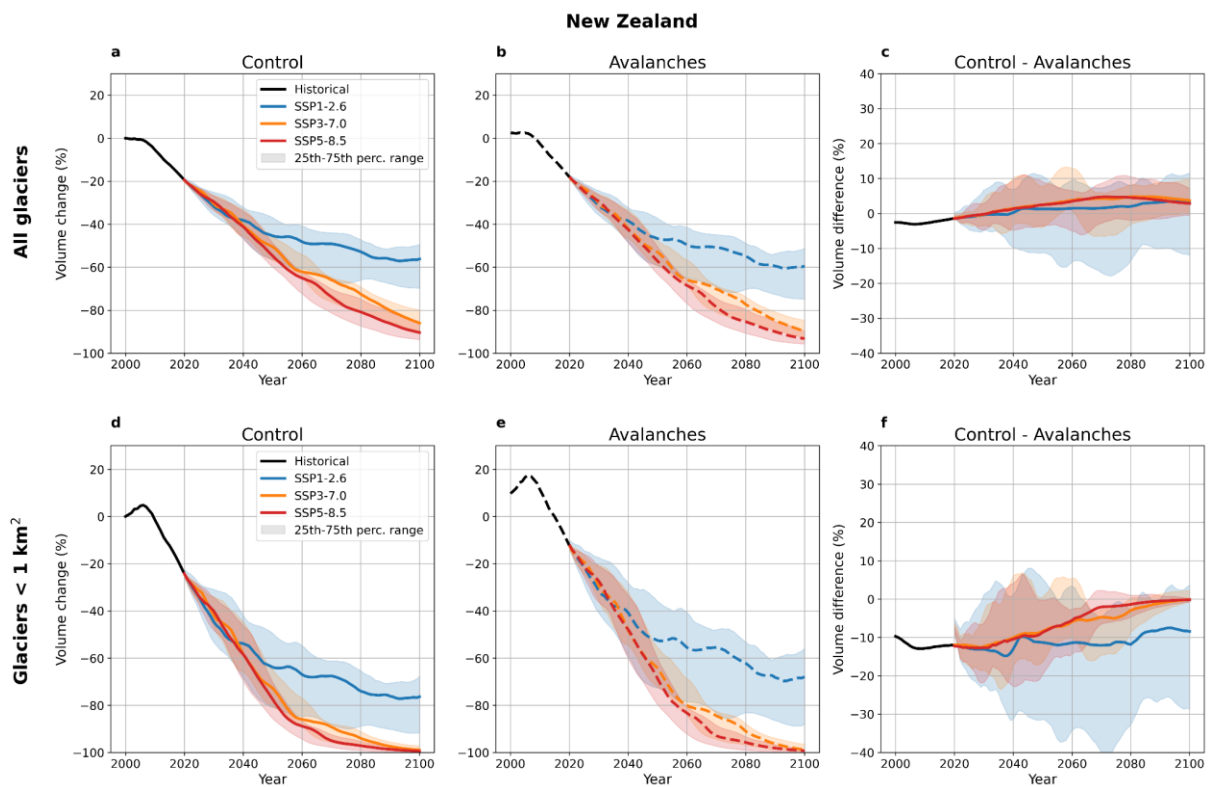

**Supplementary Figure 23: Influence of avalanches on regional glacier volume changes in New Zealand.** Same as Fig. S7 but for New Zealand.

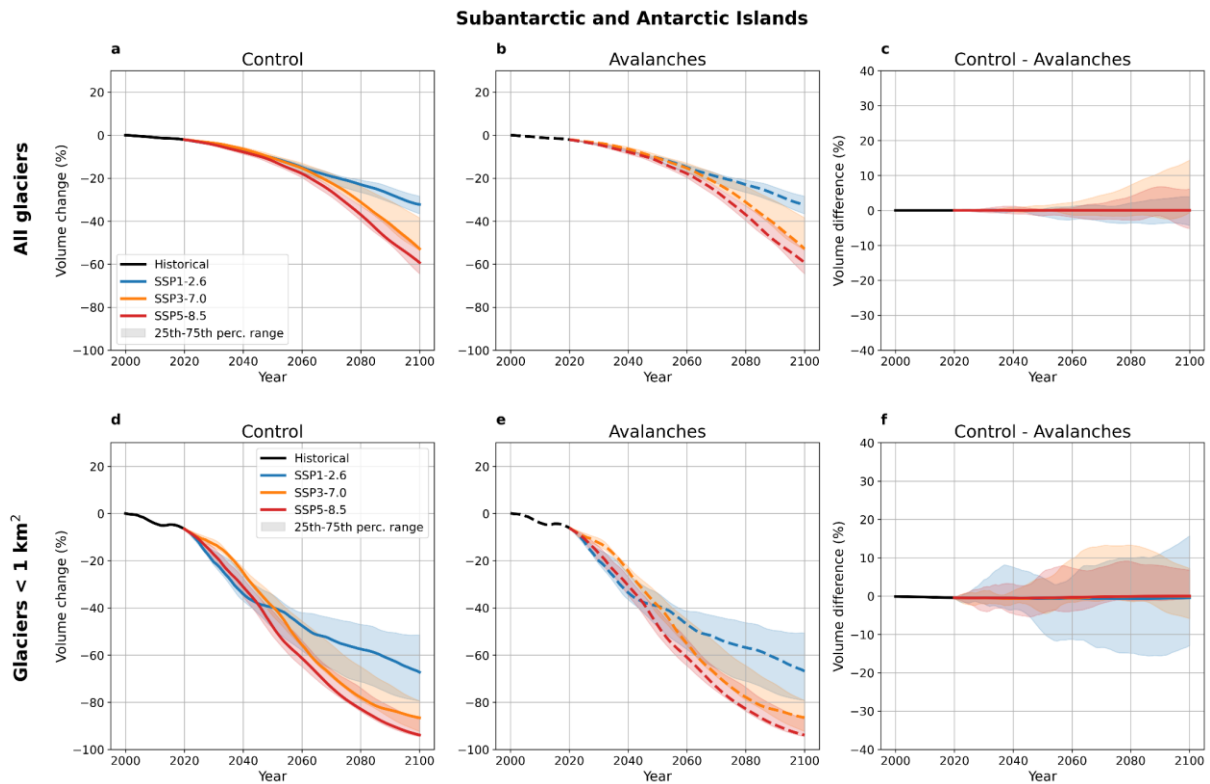

**Supplementary Figure 24: Influence of avalanches on regional glacier volume changes in the Subantarctic and Antarctic Islands.** Same as Fig. S7 but for the Subantarctic and Antarctic Islands.

## Projected avalanche contribution changes

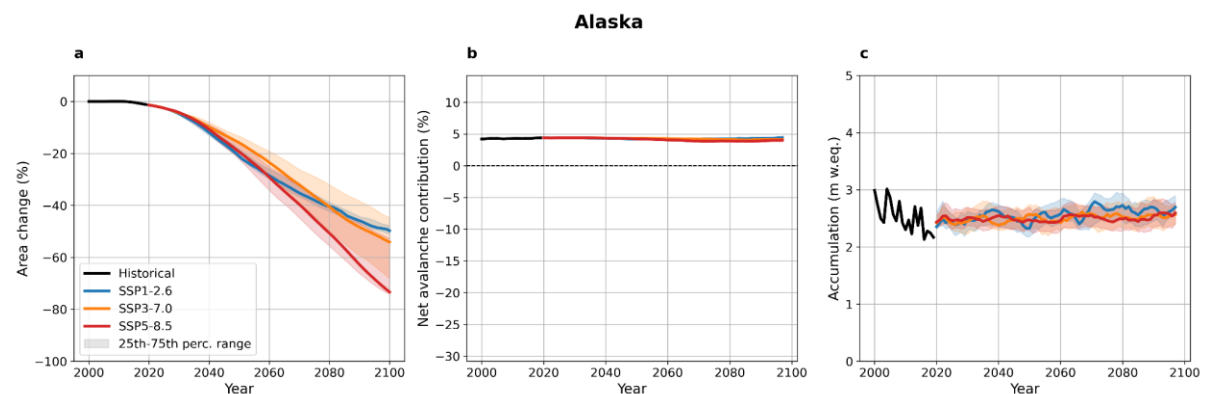

**Supplementary Figure 25: Future evolution of regional avalanche contribution in Alaska.** Projected changes of glacier area (a), avalanche contribution to accumulation (b) and total snow accumulation (c) for Alaska. The black line corresponds to the historical period over which the mass balance model was calibrated using W5E5v2.0 data. The colored lines show the median future projections for different SSP scenarios, and the shaded areas indicate the

25th-75th percentile range. The different curves were smoothed using a 5-year rolling mean, except for the historical accumulation.

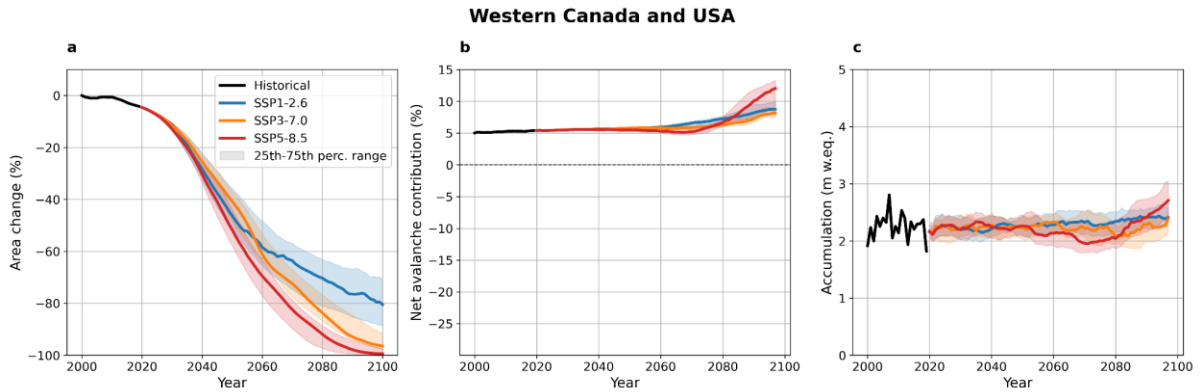

**Supplementary Figure 26: Future evolution of regional avalanche contribution in Western Canada and USA.** Same as Fig. S25 but for Western Canada and the USA.

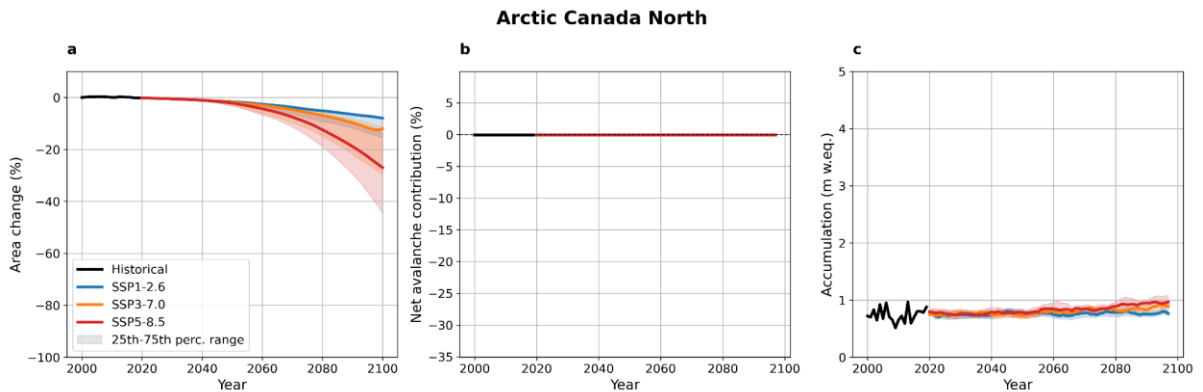

**Supplementary Figure 27: Future evolution of regional avalanche contribution in Arctic Canada North.** Same as Fig. S25 but for Arctic Canada North.

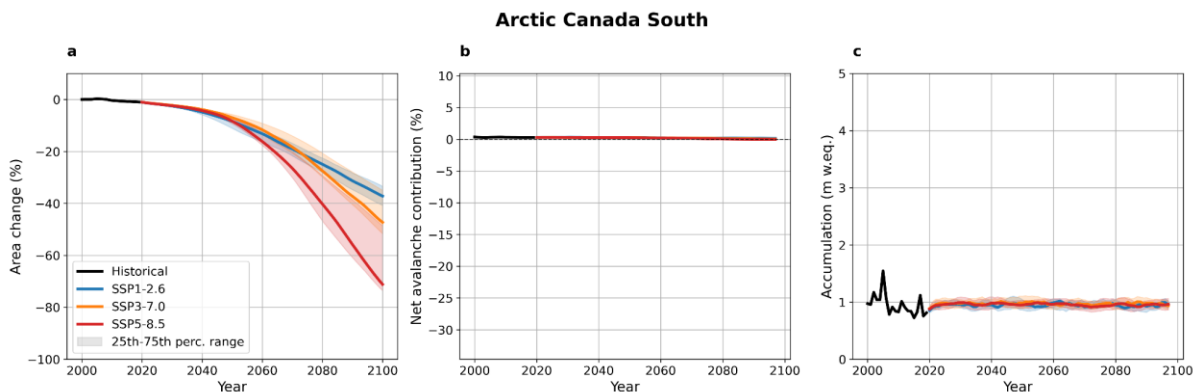

**Supplementary Figure 28: Future evolution of regional avalanche contribution in Arctic Canada South.** Same as Fig. S25 but for Arctic Canada South.

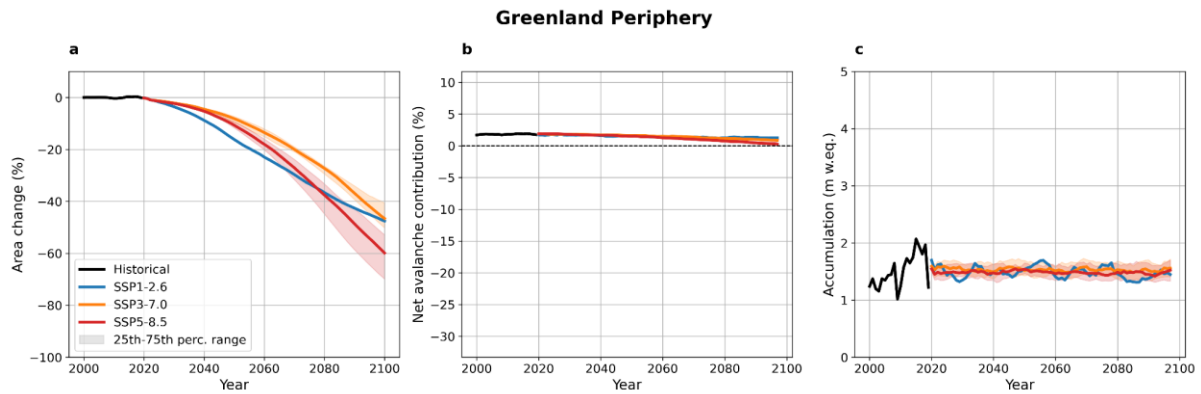

**Supplementary Figure 29: Future evolution of regional avalanche contribution in the Greenland Periphery.** Same as Fig. S25 but for the Greenland Periphery.

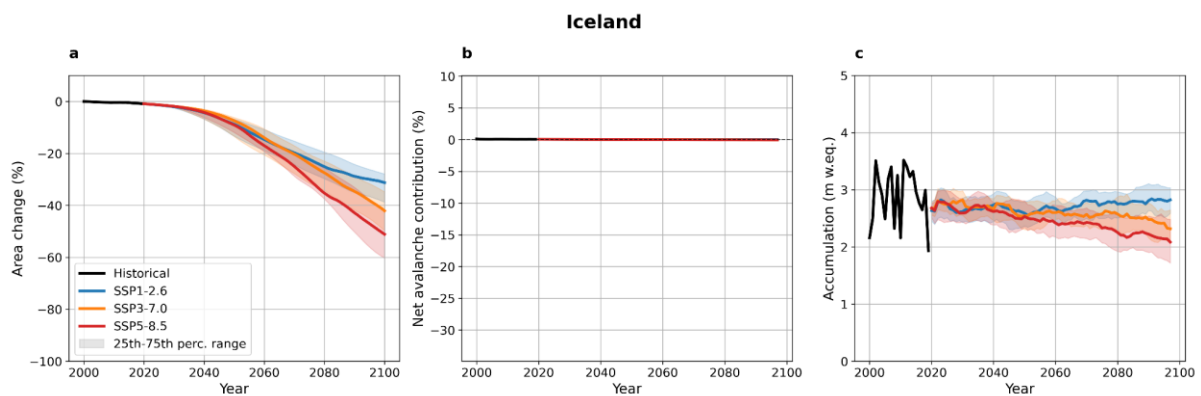

**Supplementary Figure 30: Future evolution of regional avalanche contribution in Iceland.** Same as Fig. S25 but for Iceland.

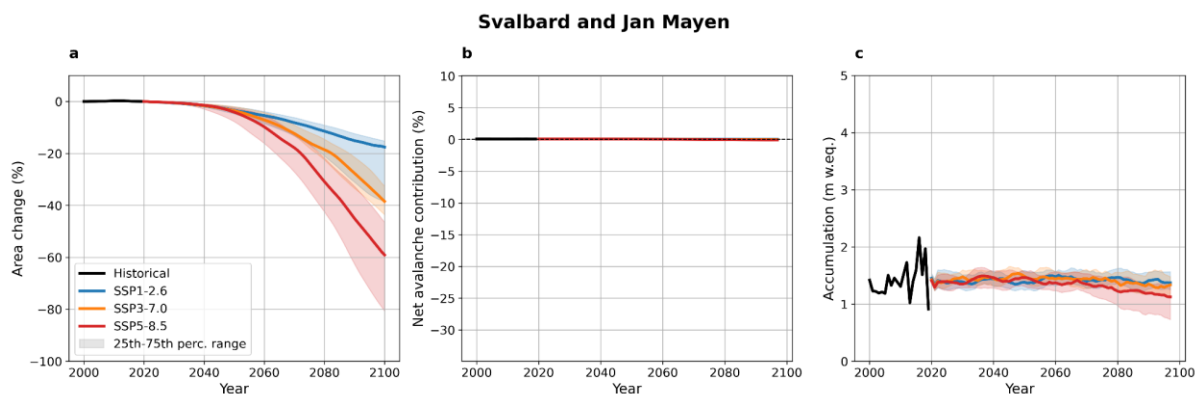

**Supplementary Figure 31: Future evolution of regional avalanche contribution in Svalbard and Jan Mayen.** Same as Fig. S25 but for Svalbard and Jan Mayen.

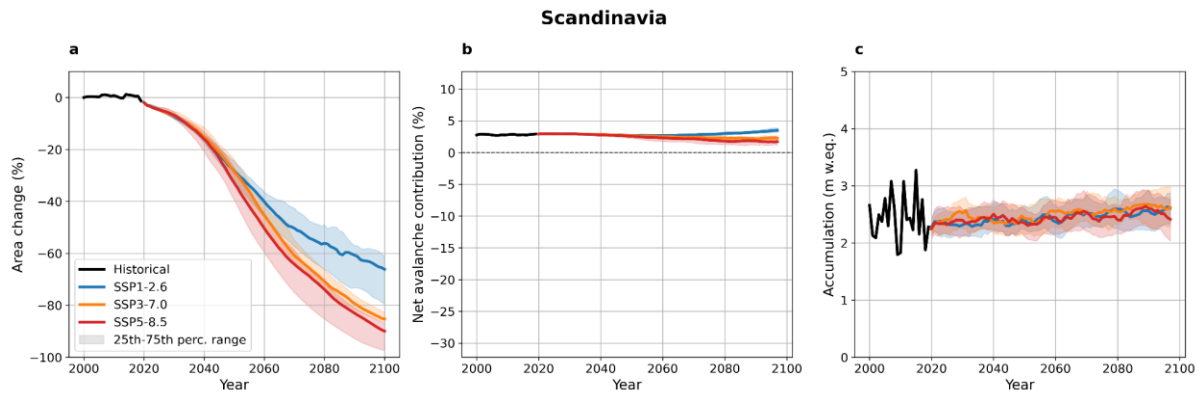

**Supplementary Figure 32: Future evolution of regional avalanche contribution in Scandinavia. Same as Fig. S25 but for Scandinavia.**

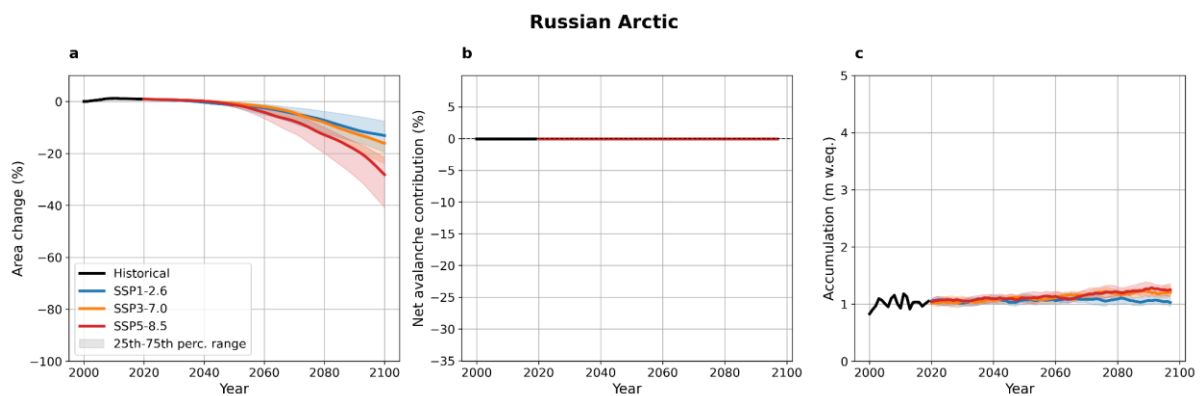

**Supplementary Figure 33: Future evolution of regional avalanche contribution in the Russian Arctic. Same as Fig. S25 but for the Russian Arctic.**

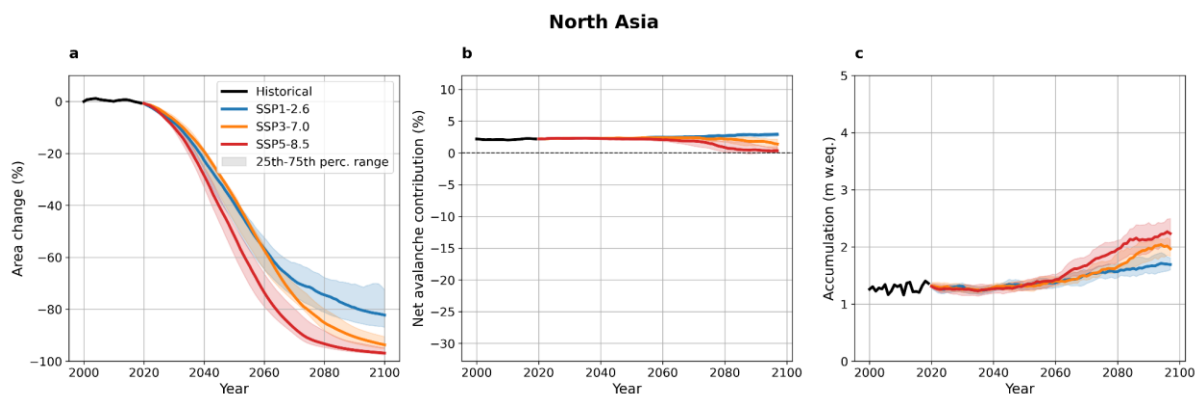

**Supplementary Figure 34: Future evolution of regional avalanche contribution in North Asia. Same as Fig. S25 but for North Asia.**

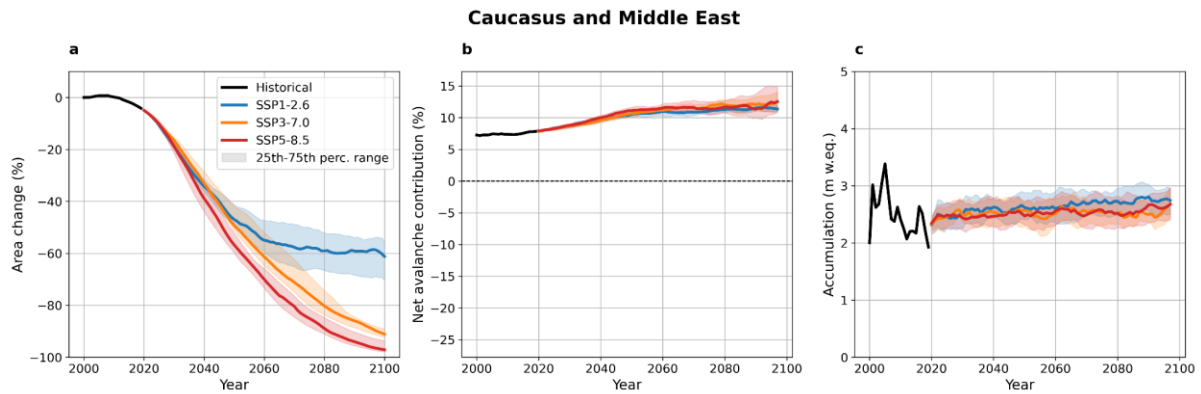

**Supplementary Figure 35: Future evolution of regional avalanche contribution in Caucasus and the Middle East. Same as Fig. S25 but for Caucasus and the Middle East.**

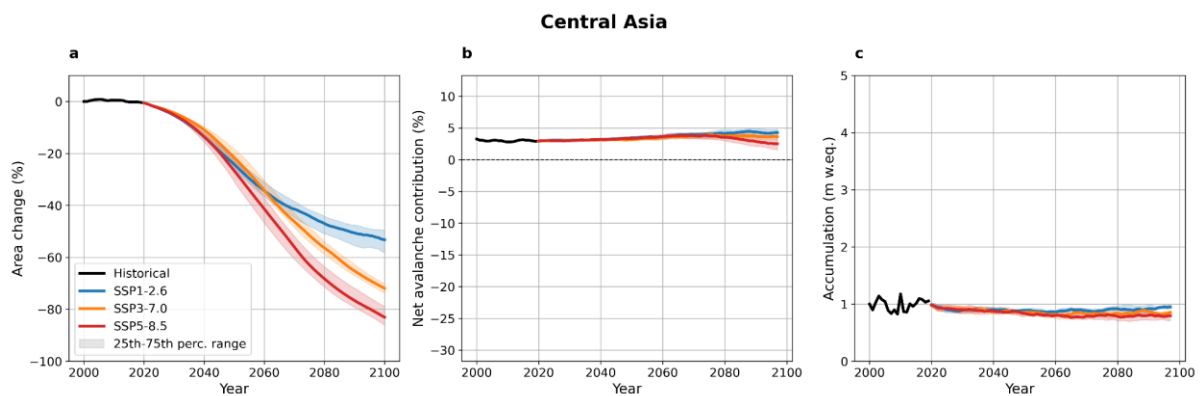

**Supplementary Figure 36: Future evolution of regional avalanche contribution in Central Asia. Same as Fig. S25 but for Central Asia.**

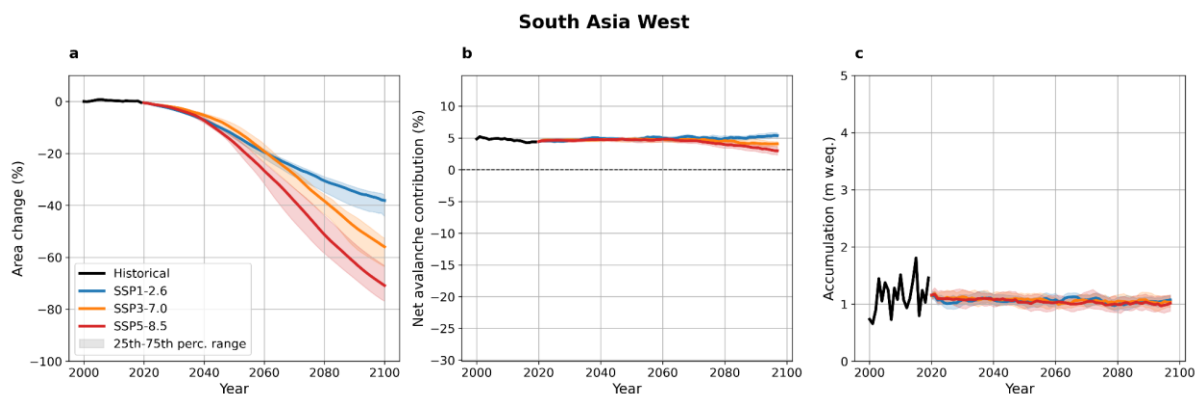

**Supplementary Figure 37: Future evolution of regional avalanche contribution in South Asia West. Same as Fig. S25 but for South Asia West.**



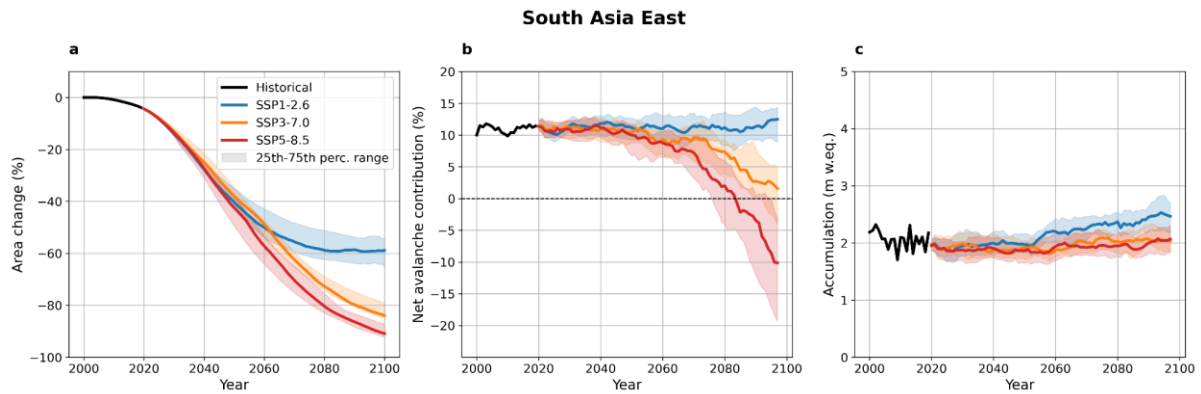

**Supplementary Figure 38: Future evolution of regional avalanche contribution in South Asia East.** Same as Fig. S25 but for South Asia East.

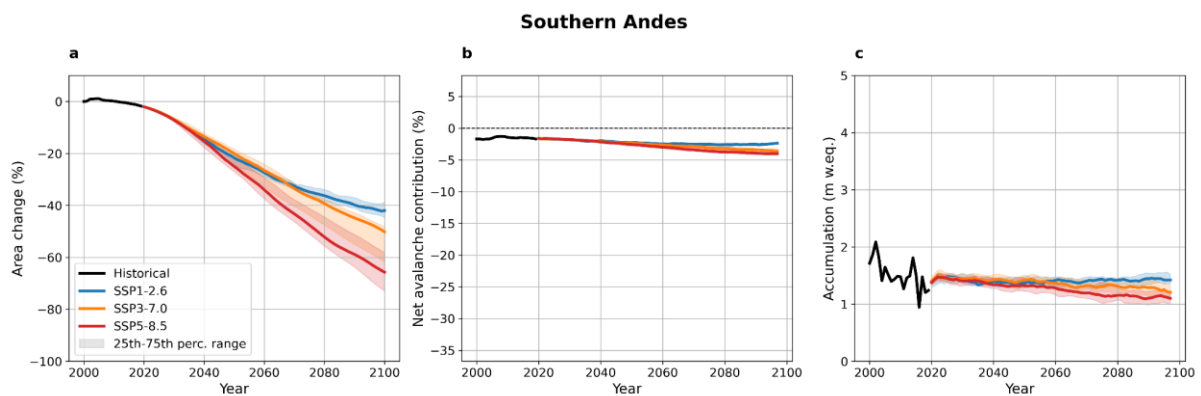

**Supplementary Figure 39: Future evolution of regional avalanche contribution in the Southern Andes.** Same as Fig. S25 but for the Southern Andes.

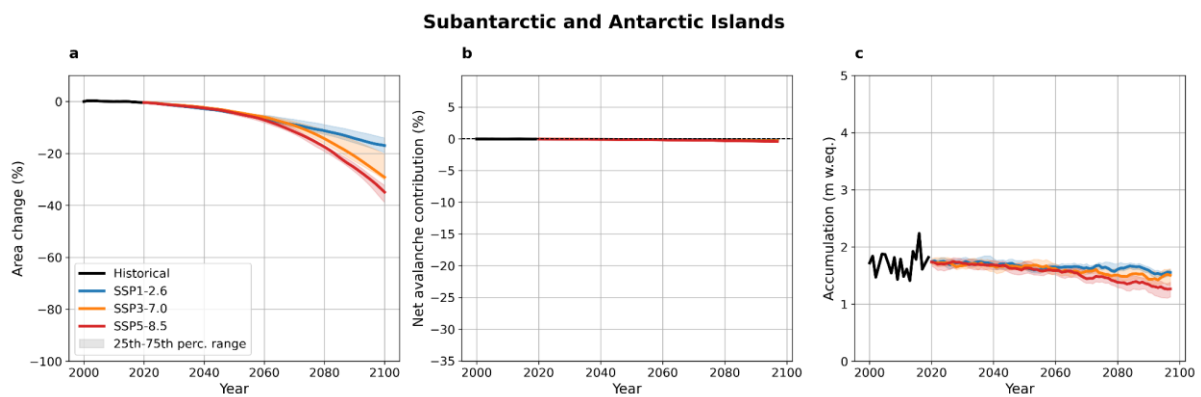

**Supplementary Figure 40: Future evolution of regional avalanche contribution in the Subantarctic and Antarctic Islands.** Same as Fig. S25 but for the Subantarctic and Antarctic Islands.



239

240 Influence of temporarily updating the avalanche contribution

241

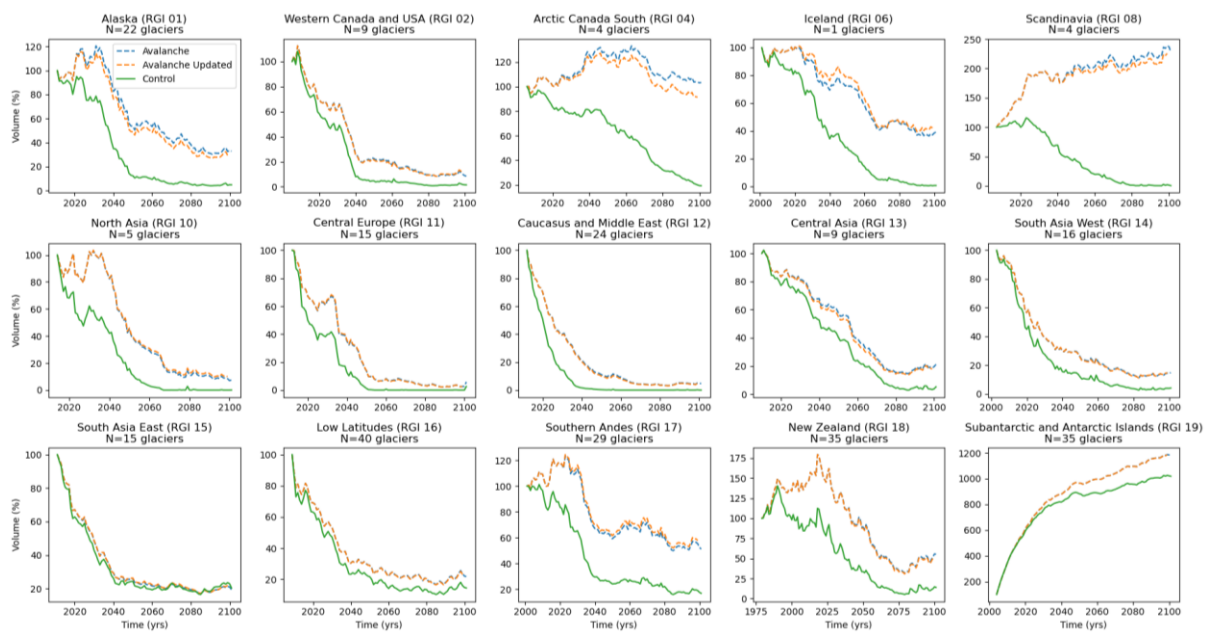

242

243 **Supplementary Figure 41: Influence of temporarily updating the avalanche contribution**  
244 **on glaciers with a negative avalanche contribution.** Glacier volume changes for 263  
245 randomly selected glaciers with a glacier-wide avalanche correction factor ( $k_{ava, gl}$ ) lower than  
246 0.8 in 15 RGI regions for the ipsl-cm6a-lr\_r1i1p1f1 GCM under the SSP 1-2.6 scenario. The  
247 green line indicates the scenario without avalanches, the blue dashed line corresponds to the  
248 scenario with fixed avalanche contribution calculated over the period 2020-2100, and the  
249 orange line corresponds to the scenario with an avalanche contribution updated every 20  
250 years.

251

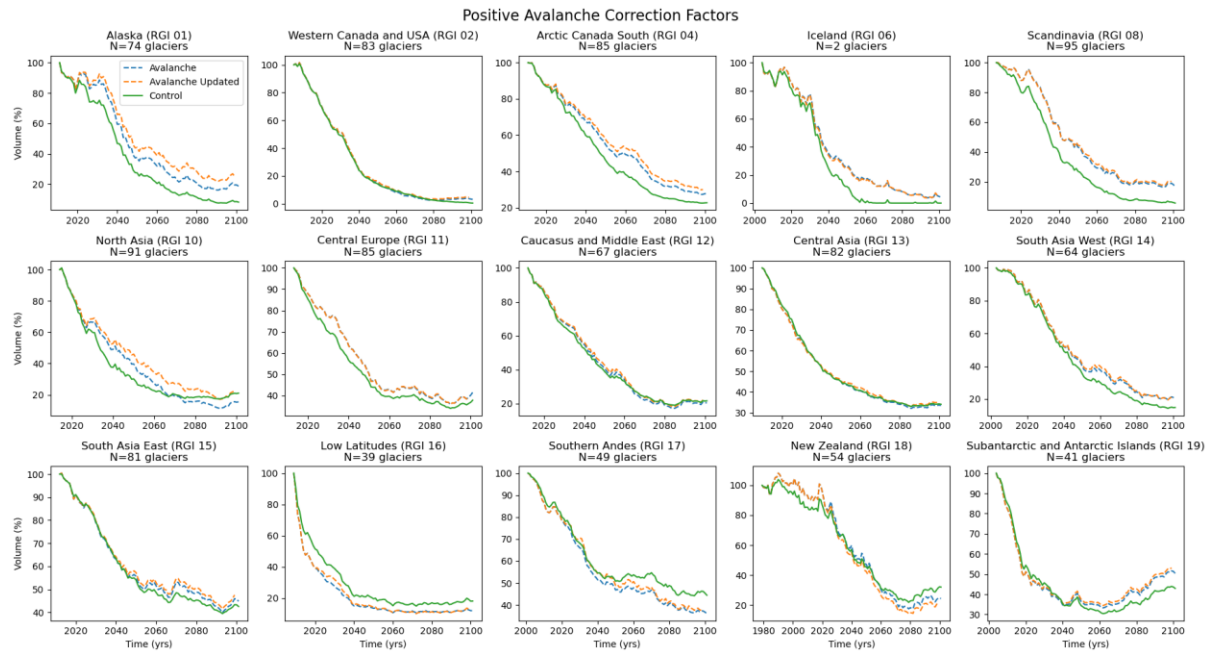

**Supplementary Figure 42: Influence of temporarily updating the avalanche contribution on glaciers with a positive avalanche contribution.** Glacier volume changes for 1003 randomly selected glaciers with a glacier-wide avalanche correction factor ( $k_{ava, gl}$ ) higher than 1.2 in 15 RGI regions for the *ipsl-cm6a-lr\_i1p1f1* GCM under the SSP 1-2.6 scenario. The green line indicates the scenario without avalanches, the blue dashed line corresponds to the scenario with fixed avalanche contribution calculated over the period 2020-2100, and the orange line corresponds to the scenario with an avalanche contribution updated every 20 years.

## Evaluation against Sentinel-1 avalanche deposits

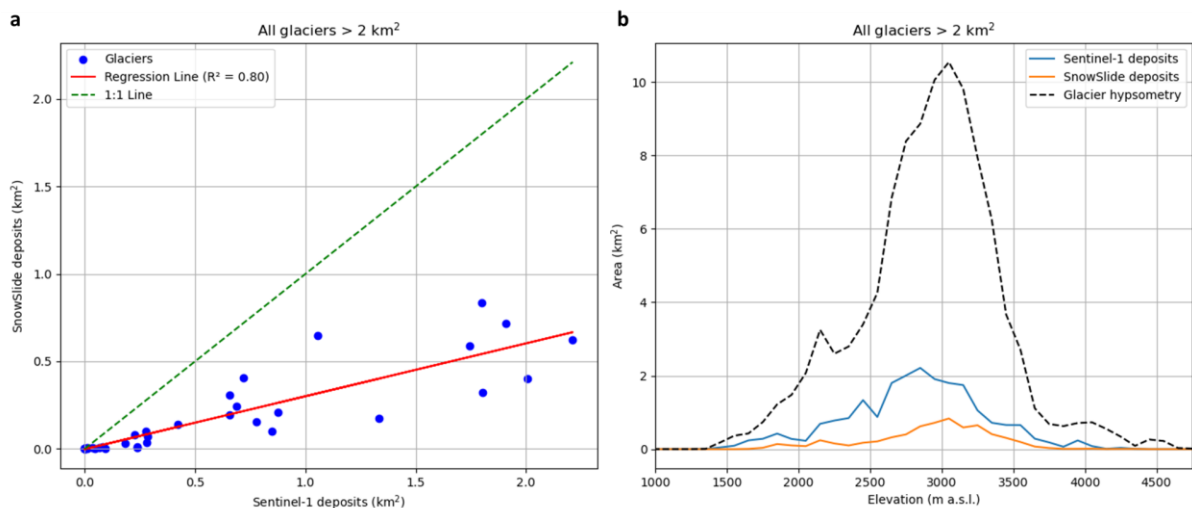

**Supplementary Figure 43: Comparison of the SnowSlide and Sentinel-1 avalanche deposit extents over the glaciers larger than 2 km<sup>2</sup> in the Mt Blanc region.** a Area of

265 SnowSlide and Sentinel-1 deposits for each individual glacier. **b** Hypsometry of the SnowSlide  
 266 and Sentinel-1 avalanche deposits and glaciers.  
 267

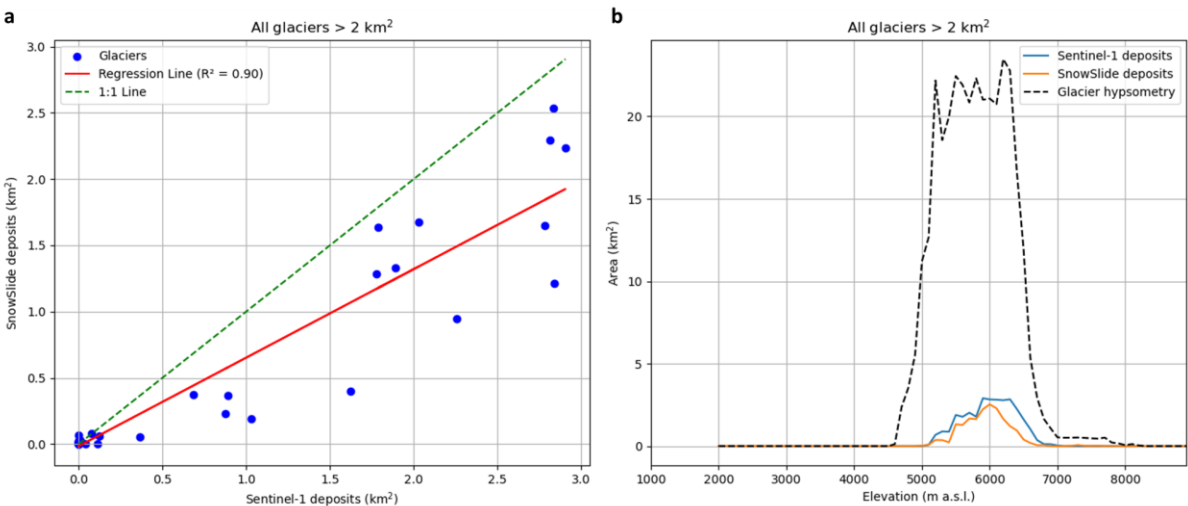

268  
 269 **Supplementary Figure 44: Comparison of the SnowSlide and Sentinel-1 avalanche**  
 270 **deposit extents over the glaciers larger than 2 km² in the Everest region. a** Area of  
 271 SnowSlide and Sentinel-1 deposits for each individual glacier. **b** Hypsometry of the SnowSlide  
 272 and Sentinel-1 avalanche deposits and glaciers.

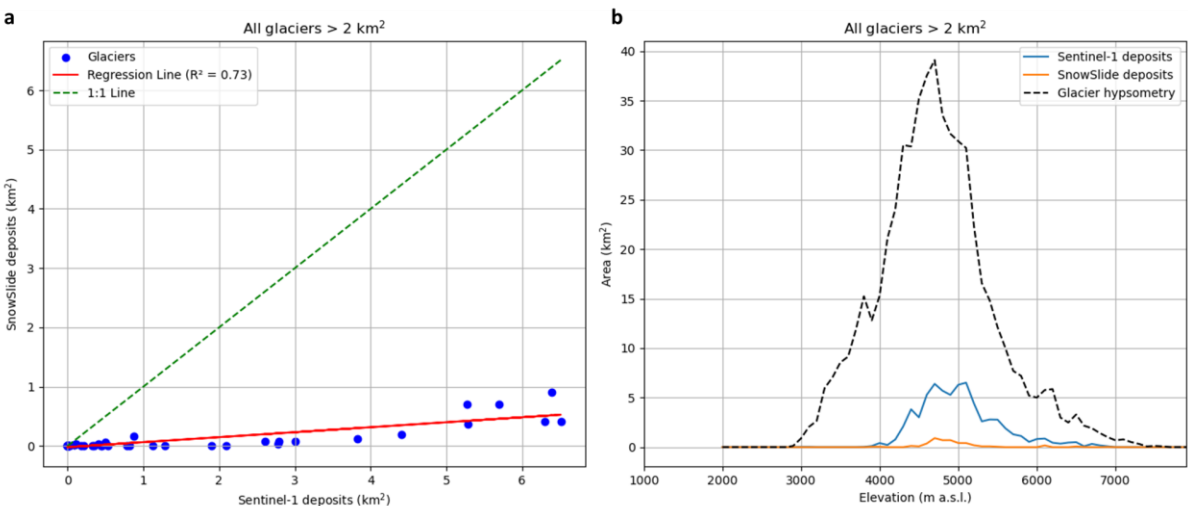

273  
 274 **Supplementary Figure 45: Comparison of the SnowSlide and Sentinel-1 avalanche**  
 275 **deposit extents over the glaciers larger than 2 km² in the Hispar region. a** Area of  
 276 SnowSlide and Sentinel-1 deposits for each individual glacier. **b** Hypsometry of the SnowSlide  
 277 and Sentinel-1 avalanche deposits and glaciers.

278

279 Evaluation against mass balance measurements

280

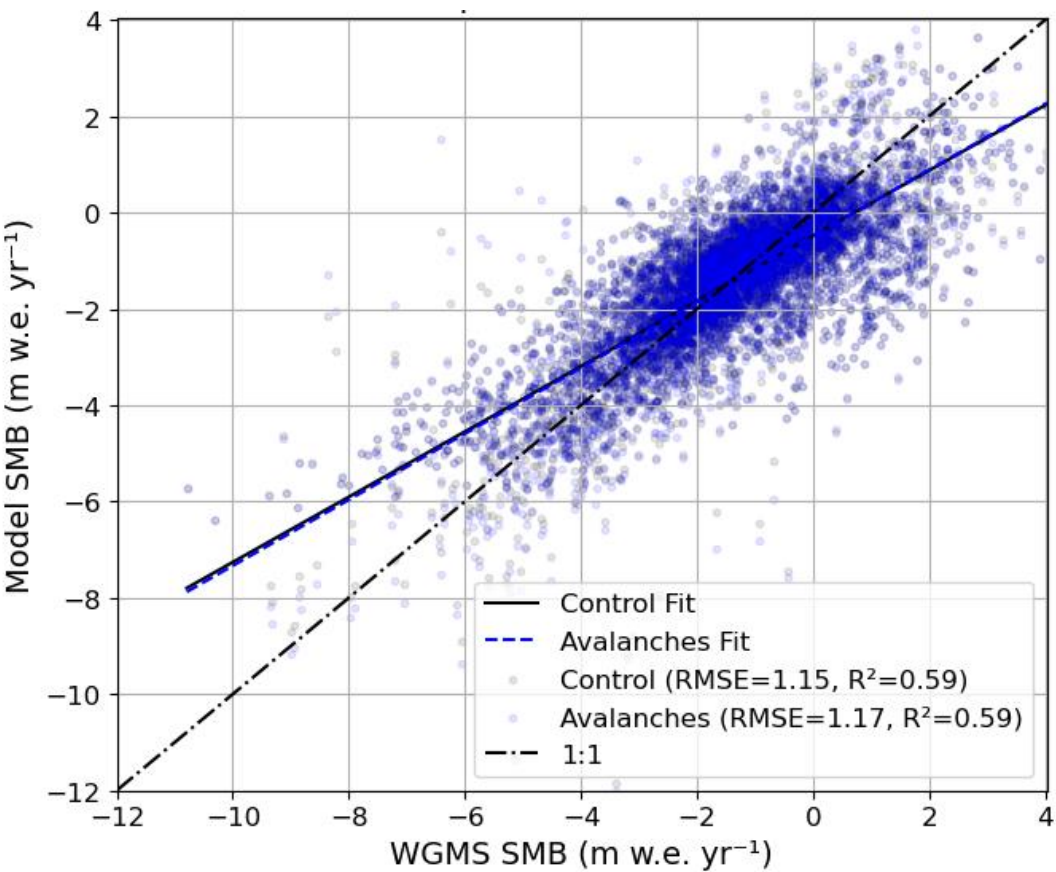

281

282 **Supplementary Figure 46: Comparison of the modeled and measured annual point**  
283 **mass balance from the World Glacier Monitoring Service.** The observation period goes  
284 from 2000 to 2020. The results from the Control simulations are in black and from the  
285 Avalanches simulations in blue.

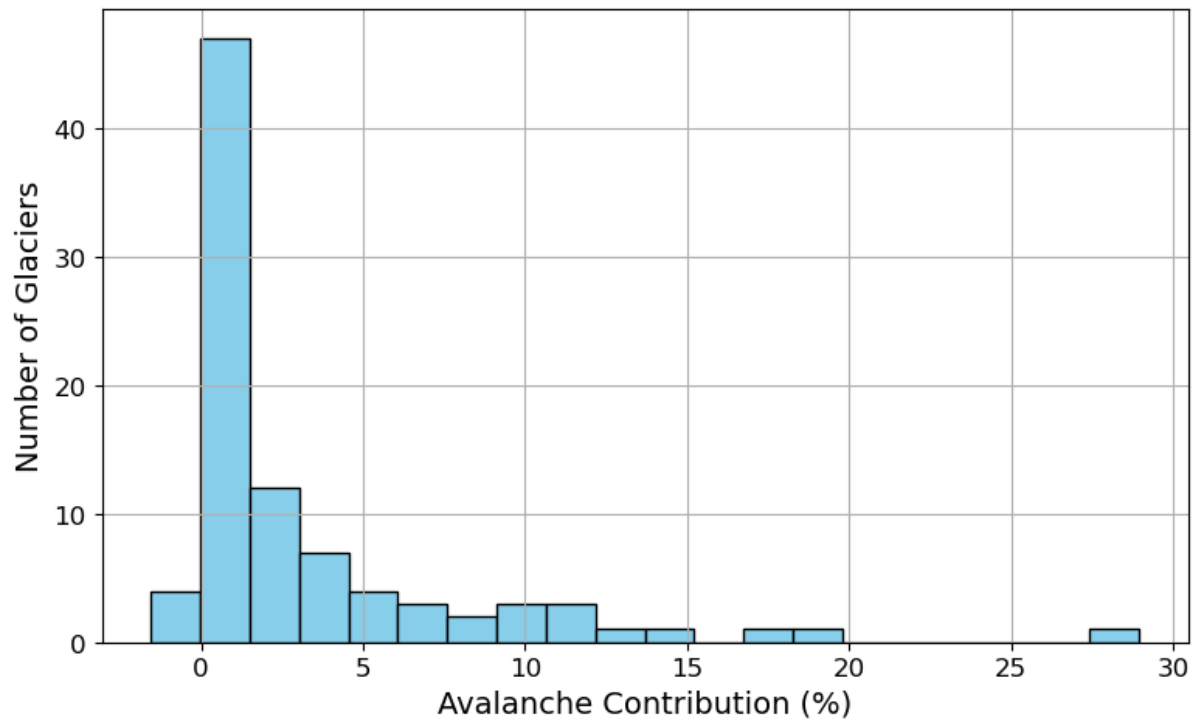

**Supplementary Figure 47: Avalanche contribution of WGMS glaciers.** Histogram of the WGMS glaciers with at least one annual mass balance measurement in the period 2000-2020 as a function of their glacier-wide avalanche contribution.

## Influence of DEM spatial resolution

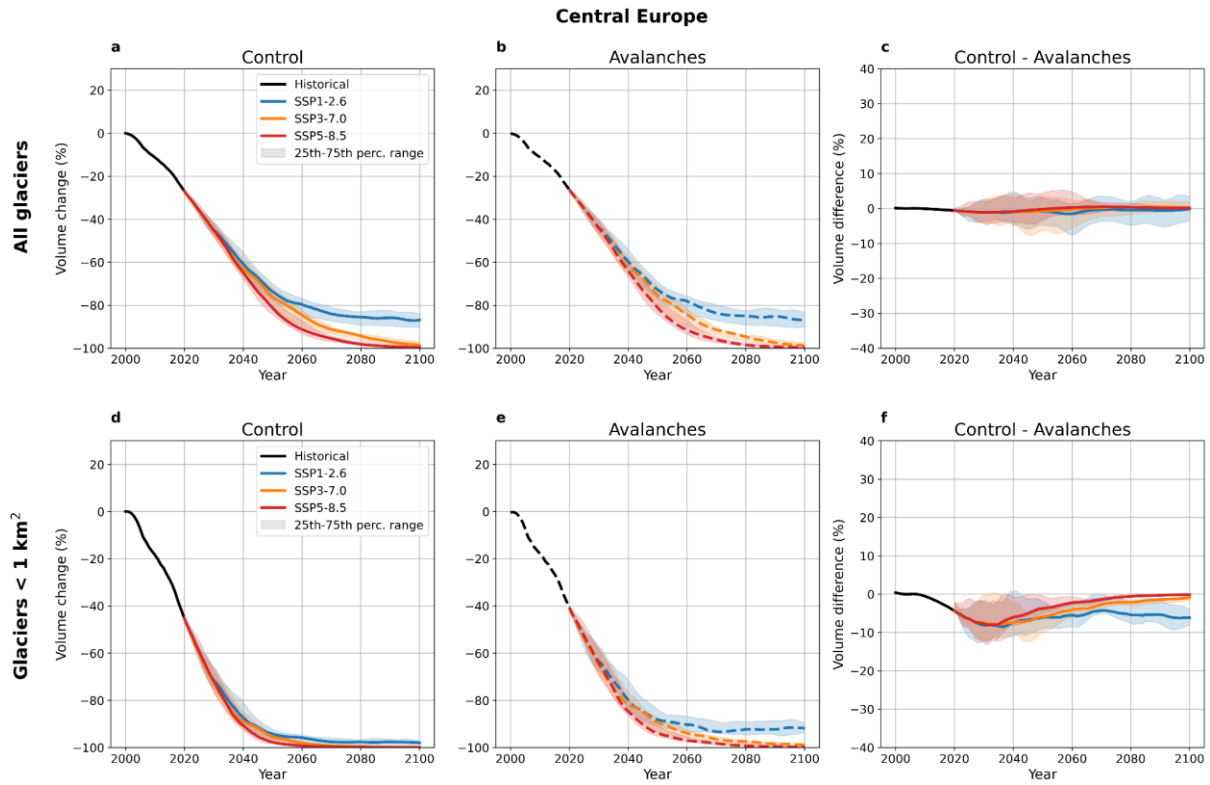

**Supplementary Figure 48: Influence of avalanches on regional glacier volume changes in Central Europe at 50 m resolution.** Projected volume changes of all glaciers (a-c) and only the glaciers smaller than 1 km<sup>2</sup> (d-f) in Central Europe, from the 'Control' (a, d) and 'Avalanches' (b, e) simulations, using a fixed DEM resolution of 50 m. The right-hand plots (c, f) show the difference between the 'Control' and the 'Avalanches' simulations, so that negative values indicate more volume in the 'Avalanches' simulations. All percentages are given relative to the initial volume in 2000 in the 'Control' simulation. The black line corresponds to the historical period over which the mass balance model was calibrated using W5E5v2.0 data. The colored lines show the median future projections for different SSP scenarios, and the shaded areas indicate the 25th-75th percentile range. The different curves were smoothed using a 5-year rolling mean.

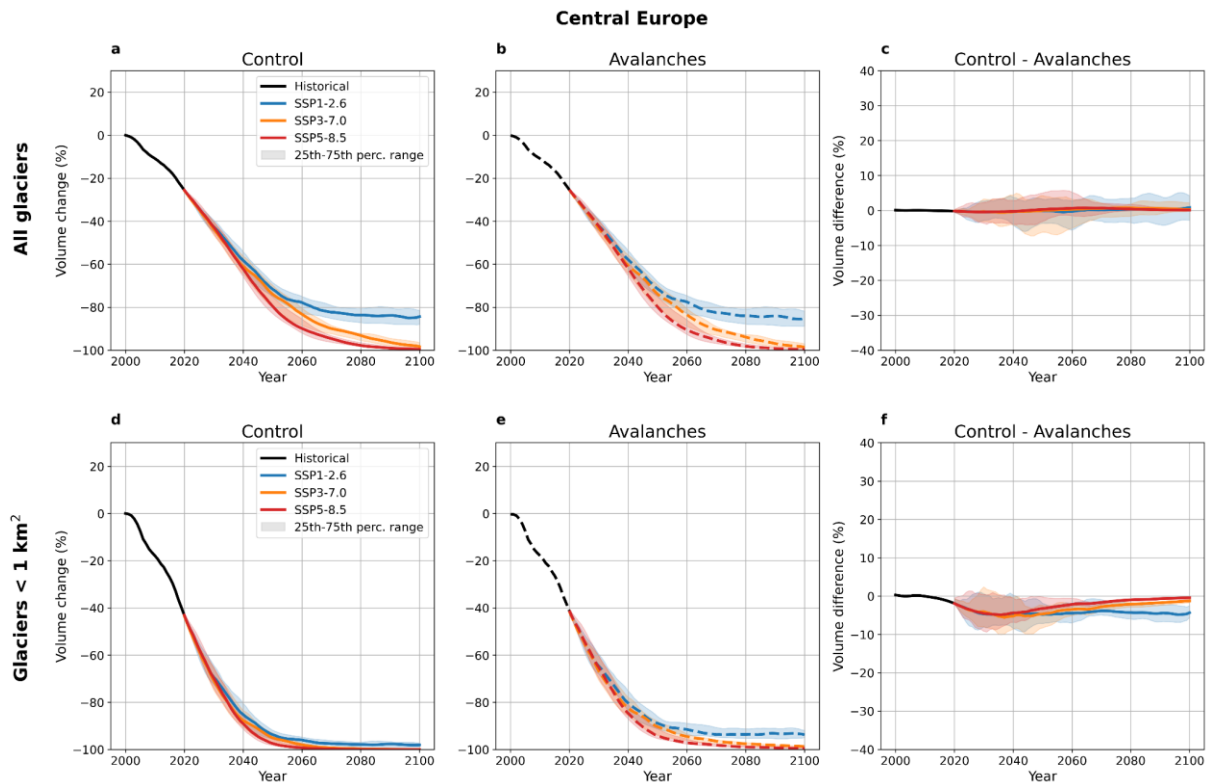

**Supplementary Figure 49: Influence of avalanches on regional glacier volume changes in Central Europe at 100 m resolution. Same as Fig. S48 but with a fixed 100m spatial resolution.**

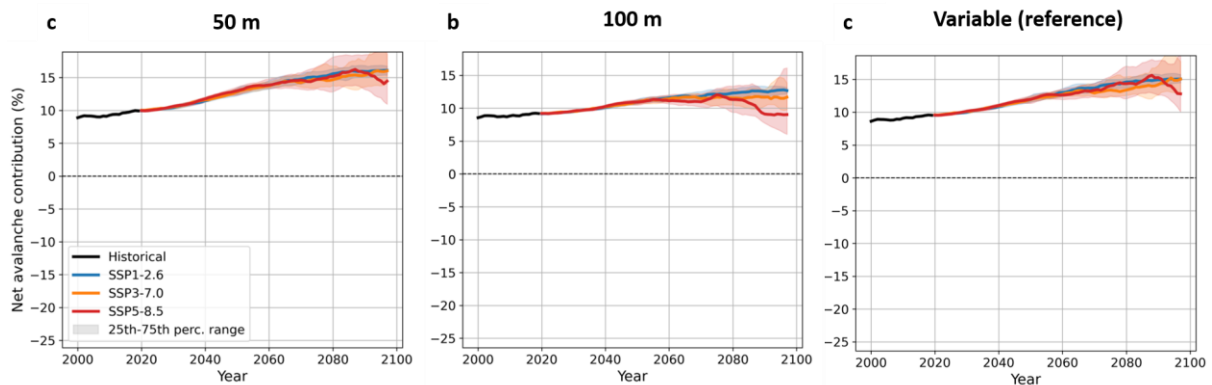

**Supplementary Figure 50: Influence of DEM spatial resolution on projected avalanche contribution. Projected changes of avalanche contribution to glacier accumulation for Central Europe at various spatial resolutions. The black line corresponds to the historical period over which the mass balance model was calibrated using W5E5v2.0 data. The colored lines show the median future projections for different SSP scenarios, and the shaded areas indicate the 25th-75th percentile range. The different curves were smoothed using a 5-year rolling mean.**
